# Supplementary material for: Complex refractive index and single scattering albedo of Icelandic dust in the shortwave spectrum
Source: Copernicus journal article supplement (doi:10.5194/egusphere-2023-276), 2023-03-10
Supplement: Supplementary file 1 [file egusphere-2023-276-supplement.pdf]

Supplement of

# **Complex refractive index and single scattering albedo of Icelandic dust in the shortwave spectrum**

Clarissa Baldo et al.

*Correspondence to:* Clarissa Baldo (c.baldo@bham.ac.uk)

**Table S1: Experiment-averaged single scattering albedo  $SSA_{avg}(\lambda) \pm$  estimated uncertainty at  $\lambda = 370, 470, 520, 590, 660, 880, 950$  nm of Icelandic dust for the base simulation, Test 1 and Test 2. In Test 1, corrections and calculations were performed using the SMPS and GRIMM data plus 1 SD uncertainty. In Test 2, we used the SMPS and GRIMM data minus 1 SD uncertainty (see section 2.2.1 in the main text for details).**

| Info            | Sample ID | $SSA_{avg}(\lambda)$ |                 |                 |                 |                 |                 |                 |
|-----------------|-----------|----------------------|-----------------|-----------------|-----------------|-----------------|-----------------|-----------------|
|                 |           | 370 nm               | 470 nm          | 520 nm          | 590 nm          | 660 nm          | 880 nm          | 950 nm          |
| Base simulation | D3        | $0.93 \pm 0.02$      | $0.95 \pm 0.01$ | $0.96 \pm 0.01$ | $0.96 \pm 0.01$ | $0.96 \pm 0.02$ | $0.96 \pm 0.01$ | $0.96 \pm 0.02$ |
| Base simulation | H55       | $0.94 \pm 0.06$      | $0.96 \pm 0.08$ | $0.96 \pm 0.08$ | $0.96 \pm 0.08$ | $0.96 \pm 0.08$ | $0.96 \pm 0.07$ | $0.96 \pm 0.07$ |
| Base simulation | Land1     | $0.91 \pm 0.05$      | $0.94 \pm 0.03$ | $0.95 \pm 0.03$ | $0.95 \pm 0.03$ | $0.96 \pm 0.04$ | $0.96 \pm 0.04$ | $0.96 \pm 0.04$ |
| Base simulation | Maeli2    | $0.90 \pm 0.03$      | $0.93 \pm 0.02$ | $0.94 \pm 0.02$ | $0.95 \pm 0.02$ | $0.95 \pm 0.01$ | $0.96 \pm 0.01$ | $0.95 \pm 0.02$ |
| Base simulation | MIR45     | $0.90 \pm 0.04$      | $0.92 \pm 0.03$ | $0.93 \pm 0.02$ | $0.94 \pm 0.03$ | $0.94 \pm 0.03$ | $0.94 \pm 0.03$ | $0.94 \pm 0.03$ |
| Test 1          | D3        | $0.93 \pm 0.02$      | $0.95 \pm 0.01$ | $0.96 \pm 0.01$ | $0.96 \pm 0.01$ | $0.96 \pm 0.02$ | $0.96 \pm 0.01$ | $0.96 \pm 0.01$ |
| Test 1          | H55       | $0.94 \pm 0.05$      | $0.96 \pm 0.07$ | $0.96 \pm 0.07$ | $0.96 \pm 0.08$ | $0.96 \pm 0.08$ | $0.96 \pm 0.07$ | $0.96 \pm 0.07$ |
| Test 1          | Land1     | $0.91 \pm 0.05$      | $0.94 \pm 0.03$ | $0.95 \pm 0.03$ | $0.95 \pm 0.03$ | $0.96 \pm 0.04$ | $0.96 \pm 0.04$ | $0.96 \pm 0.04$ |
| Test 1          | Maeli2    | $0.90 \pm 0.03$      | $0.93 \pm 0.02$ | $0.94 \pm 0.02$ | $0.95 \pm 0.02$ | $0.95 \pm 0.01$ | $0.96 \pm 0.02$ | $0.96 \pm 0.02$ |
| Test 1          | MIR45     | $0.90 \pm 0.04$      | $0.92 \pm 0.02$ | $0.93 \pm 0.02$ | $0.94 \pm 0.03$ | $0.94 \pm 0.03$ | $0.94 \pm 0.03$ | $0.94 \pm 0.03$ |
| Test 2          | D3        | $0.93 \pm 0.01$      | $0.95 \pm 0.01$ | $0.96 \pm 0.01$ | $0.96 \pm 0.02$ | $0.96 \pm 0.02$ | $0.96 \pm 0.02$ | $0.96 \pm 0.02$ |
| Test 2          | H55       | $0.94 \pm 0.06$      | $0.96 \pm 0.08$ |
| Test 2          | Land1     | $0.91 \pm 0.04$      | $0.93 \pm 0.02$ | $0.95 \pm 0.03$ | $0.95 \pm 0.03$ | $0.96 \pm 0.03$ | $0.96 \pm 0.04$ | $0.96 \pm 0.04$ |
| Test 2          | Maeli2    | $0.90 \pm 0.02$      | $0.93 \pm 0.01$ | $0.94 \pm 0.01$ | $0.95 \pm 0.01$ | $0.95 \pm 0.01$ | $0.95 \pm 0.01$ | $0.95 \pm 0.01$ |
| Test 2          | MIR45     | $0.90 \pm 0.05$      | $0.92 \pm 0.04$ | $0.93 \pm 0.03$ | $0.94 \pm 0.04$ | $0.94 \pm 0.04$ | $0.94 \pm 0.04$ | $0.94 \pm 0.04$ |

**Table S2: Experiment-averaged imaginary index  $k_{\text{avg}}(\lambda) \pm$  estimated uncertainty at  $\lambda = 370, 470, 520, 590, 660, 880, 950$  nm of Icelandic dust for the base simulation, Test 1 and Test 2. In Test 1, corrections and calculations were performed using the SMPS and GRIMM data plus 1 SD uncertainty. In Test 2, we used the SMPS and GRIMM data minus 1 SD uncertainty (see section 2.2.1 in the main text for details).**

| Info            | Sample ID | $k_{\text{avg}}(\lambda)$ |                   |                   |                   |                   |                   |                   |
|-----------------|-----------|---------------------------|-------------------|-------------------|-------------------|-------------------|-------------------|-------------------|
|                 |           | 370 nm                    | 470 nm            | 520 nm            | 590 nm            | 660 nm            | 880 nm            | 950 nm            |
| Base simulation | D3        | $0.006 \pm 0.003$         | $0.005 \pm 0.002$ | $0.003 \pm 0.002$ | $0.002 \pm 0.001$ | $0.002 \pm 0$     | $0.002 \pm 0$     | $0.002 \pm 0$     |
| Base simulation | H55       | $0.005 \pm 0.002$         | $0.005 \pm 0.003$ | $0.005 \pm 0.002$ | $0.002 \pm 0.001$ | $0.003 \pm 0$     | $0.002 \pm 0$     | $0.002 \pm 0$     |
| Base simulation | Land1     | $0.005 \pm 0.002$         | $0.005 \pm 0.003$ | $0.005 \pm 0.003$ | $0.005 \pm 0.002$ | $0.004 \pm 0.002$ | $0.003 \pm 0.001$ | $0.002 \pm 0.001$ |
| Base simulation | Maeli2    | $0.005 \pm 0.003$         | $0.005 \pm 0.003$ | $0.002 \pm 0.002$ | $0.004 \pm 0.002$ | $0.003 \pm 0.001$ | $0.002 \pm 0.001$ | $0.002 \pm 0.001$ |
| Base simulation | MIR45     | $0.005 \pm 0.002$         | $0.005 \pm 0.002$ | $0.004 \pm 0.001$ | $0.004 \pm 0.001$ | $0.003 \pm 0.001$ | $0.003 \pm 0$     | $0.003 \pm 0$     |
| Test 1          | D3        | $0.002 \pm 0.001$         | $0.001 \pm 0$     |
| Test 1          | H55       | $0.003 \pm 0.001$         | $0.002 \pm 0.001$ | $0.001 \pm 0$     | $0.001 \pm 0$     | $0.001 \pm 0$     | $0.002 \pm 0.001$ | $0.002 \pm 0$     |
| Test 1          | Land1     | $0.003 \pm 0.002$         | $0.002 \pm 0$     | $0.002 \pm 0$     | $0.001 \pm 0$     | $0.001 \pm 0$     | $0.001 \pm 0.001$ | $0.002 \pm 0$     |
| Test 1          | Maeli2    | $0.002 \pm 0.001$         | $0.002 \pm 0.001$ | $0.002 \pm 0$     |
| Test 1          | MIR45     | $0.002 \pm 0.001$         | $0.002 \pm 0.001$ | $0.002 \pm 0.001$ | $0.002 \pm 0.001$ | $0.002 \pm 0.001$ | $0.002 \pm 0$     | $0.002 \pm 0$     |
| Test 2          | D3        | $0.003 \pm 0.001$         | $0.002 \pm 0$     | $0.002 \pm 0$     | $0.002 \pm 0$     | $0.004 \pm 0.002$ | $0.002 \pm 0$     | $0.007 \pm 0.002$ |
| Test 2          | H55       | $0.002 \pm 0$             | $0.004 \pm 0.001$ | $0.005 \pm 0.001$ | $0.006 \pm 0.002$ | $0.007 \pm 0$     | $0.006 \pm 0.002$ | $0.007 \pm 0$     |
| Test 2          | Land1     | $0.005 \pm 0$             | $0.003 \pm 0.001$ | $0.003 \pm 0.001$ | $0.003 \pm 0.001$ | $0.004 \pm 0.002$ | $0.005 \pm 0.001$ | $0.006 \pm 0.002$ |
| Test 2          | Maeli2    | $0.004 \pm 0$             | $0.004 \pm 0.002$ | $0.002 \pm 0.001$ | $0.002 \pm 0$     | $0.002 \pm 0$     | $0.005 \pm 0.001$ | $0.005 \pm 0.001$ |
| Test 2          | MIR45     | $0.007 \pm 0$             | $0.006 \pm 0$     | $0.006 \pm 0.001$ | $0.005 \pm 0$     | $0.005 \pm 0$     | $0.006 \pm 0$     | $0.006 \pm 0$     |

**Table S3: Experiment-averaged real index  $n_{\text{avg}}(\lambda) \pm$  estimated uncertainty at  $\lambda = 370, 470, 520, 590, 660, 880, 950$  nm of Icelandic dust for the base simulation, Test 1 and Test 2. In Test 1, corrections and calculations were performed using the SMPS and GRIMM data plus 1 SD uncertainty. In Test 2, we used the SMPS and GRIMM data minus 1 SD uncertainty (see section 2.2.1 in the main text for details).**

| Info            | Sample ID | $n_{\text{avg}}(\lambda)$ |                 |                 |                 |                 |                 |                 |
|-----------------|-----------|---------------------------|-----------------|-----------------|-----------------|-----------------|-----------------|-----------------|
|                 |           | 370 nm                    | 470 nm          | 520 nm          | 590 nm          | 660 nm          | 880 nm          | 950 nm          |
| Base simulation | D3        | $1.60 \pm 0.02$           | $1.61 \pm 0.02$ | $1.61 \pm 0.02$ | $1.61 \pm 0.02$ | $1.60 \pm 0$    | $1.60 \pm 0$    | $1.60 \pm 0$    |
| Base simulation | H55       | $1.59 \pm 0.02$           | $1.60 \pm 0.02$ | $1.62 \pm 0.01$ | $1.61 \pm 0.02$ | $1.61 \pm 0.03$ | $1.60 \pm 0$    | $1.60 \pm 0$    |
| Base simulation | Land1     | $1.59 \pm 0.02$           | $1.59 \pm 0.01$ | $1.60 \pm 0.02$ | $1.60 \pm 0.02$ | $1.61 \pm 0.02$ | $1.60 \pm 0.02$ | $1.61 \pm 0.02$ |
| Base simulation | Maeli2    | $1.59 \pm 0.02$           | $1.60 \pm 0.02$ | $1.60 \pm 0.03$ | $1.61 \pm 0.02$ | $1.60 \pm 0.02$ | $1.61 \pm 0.02$ | $1.61 \pm 0.02$ |
| Base simulation | MIR45     | $1.60 \pm 0.02$           | $1.60 \pm 0.02$ | $1.60 \pm 0.02$ | $1.59 \pm 0.02$ | $1.60 \pm 0.02$ | $1.60 \pm 0.02$ | $1.60 \pm 0.02$ |
| Test 1          | D3        | $1.60 \pm 0.02$           | $1.58 \pm 0$    | $1.58 \pm 0$    | $1.58 \pm 0$    | $1.60 \pm 0.03$ | $1.60 \pm 0.03$ | $1.60 \pm 0.02$ |
| Test 1          | H55       | $1.60 \pm 0.02$           | $1.60 \pm 0.02$ | $1.58 \pm 0$    | $1.59 \pm 0.02$ | $1.60 \pm 0.02$ | $1.59 \pm 0.01$ | $1.60 \pm 0$    |
| Test 1          | Land1     | $1.60 \pm 0.02$           | $1.60 \pm 0$    | $1.60 \pm 0$    | $1.60 \pm 0.02$ | $1.60 \pm 0.02$ | $1.60 \pm 0.02$ | $1.60 \pm 0$    |
| Test 1          | Maeli2    | $1.60 \pm 0.02$           | $1.60 \pm 0.02$ | $1.60 \pm 0$    |
| Test 1          | MIR45     | $1.60 \pm 0.02$           | $1.60 \pm 0.02$ | $1.60 \pm 0.02$ | $1.60 \pm 0.02$ | $1.61 \pm 0.02$ | $1.60 \pm 0$    | $1.60 \pm 0$    |
| Test 2          | D3        | $1.60 \pm 0.02$           | $1.60 \pm 0.02$ | $1.60 \pm 0.02$ | $1.59 \pm 0.02$ | $1.59 \pm 0.02$ | $1.58 \pm 0$    | $1.60 \pm 0.02$ |
| Test 2          | H55       | $1.60 \pm 0.02$           | $1.61 \pm 0.02$ | $1.62 \pm 0.01$ | $1.60 \pm 0.02$ | $1.59 \pm 0$    | $1.59 \pm 0.02$ | $1.63 \pm 0$    |
| Test 2          | Land1     | $1.62 \pm 0.01$           | $1.60 \pm 0.02$ | $1.60 \pm 0.03$ | $1.61 \pm 0.03$ | $1.60 \pm 0.03$ | $1.61 \pm 0.02$ | $1.60 \pm 0.02$ |
| Test 2          | Maeli2    | $1.62 \pm 0.02$           | $1.61 \pm 0.02$ | $1.60 \pm 0.02$ | $1.60 \pm 0.02$ | $1.60 \pm 0.02$ | $1.60 \pm 0.02$ | $1.61 \pm 0.02$ |
| Test 2          | MIR45     | $1.57 \pm 0$              | $1.59 \pm 0.02$ | $1.60 \pm 0.02$ | $1.62 \pm 0$    | $1.62 \pm 0$    | $1.58 \pm 0.02$ | $1.60 \pm 0$    |

**Table S4: Comparison between  $SSA_{avg}(\lambda)$  calculated using the measured Mie coefficients and the single scattering albedo retrieved using the complex refractive indices from the results of the base simulation, Test 1 and Test 2. In Test 1, corrections and calculations were performed using the SMPS and GRIMM data plus 1 SD uncertainty. In Test 2, we used the SMPS and GRIMM data minus 1 SD uncertainty (see section 2.2.1 in the main text for details). The reduced major axis (RMA) regression slope and intercept are reported, in addition to the  $R^2$  value and root mean square error (RMSE).**

| Info            | Sample ID | Slope | Intercept | $R^2$ | RMSE |
|-----------------|-----------|-------|-----------|-------|------|
| Base Simulation | D3        | 4.75  | -3.62     | 0.84  | 0.06 |
| Test 1          | D3        | 1.15  | -0.13     | 0.95  | 0.01 |
| Test 2          | D3        | 2.64  | -1.59     | 0.29  | 0.04 |
| Base Simulation | H55       | 6.69  | -5.50     | 0.68  | 0.07 |
| Test 1          | H55       | 4.46  | -3.33     | 0.95  | 0.03 |
| Test 2          | H55       | -3.28 | 4.03      | 0.72  | 0.08 |
| Base Simulation | Land1     | 2.72  | -1.68     | 0.75  | 0.06 |
| Test 1          | Land1     | 1.92  | -0.87     | 0.96  | 0.02 |
| Test 2          | Land1     | 1.62  | -0.62     | 0.43  | 0.04 |
| Base Simulation | Maeli2    | 2.49  | -1.44     | 0.79  | 0.04 |
| Test 1          | Maeli2    | 0.76  | 0.22      | 0.88  | 0.01 |
| Test 2          | Maeli2    | 1.75  | -0.72     | 0.59  | 0.03 |
| Base Simulation | MIR45     | 2.46  | -1.38     | 0.89  | 0.04 |
| Test 1          | MIR45     | 0.81  | 0.18      | 0.80  | 0.01 |
| Test 2          | MIR45     | 2.24  | -1.20     | 0.95  | 0.05 |

**Table S5: Reference complex refractive indices of the individual mineral components of Icelandic dust**

| Mineral        | Reference                         | 370 nm |       | 470 nm |       | 520 nm |       | 590 nm |       | 660 nm |       | 880 nm |       | 950 nm |       |
|----------------|-----------------------------------|--------|-------|--------|-------|--------|-------|--------|-------|--------|-------|--------|-------|--------|-------|
|                |                                   | n      | k     | n      | k     | n      | k     | n      | k     | n      | k     | n      | k     | n      | k     |
| Augite         | Egan and Hilgeman (1979)          | 1.71   | 0.001 | 1.69   | 0.001 | 1.69   | 0.001 | 1.69   | 0.001 | 1.67   | 0.001 | 1.69   | 0.002 | 1.68   | 0.002 |
| Basaltic glass | Pollack et al. (1973)             | 1.57   | -     | 1.57   | 0.001 | 1.57   | 0.001 | 1.57   | 0     | 1.56   | 0     | 1.55   | 0.001 | 1.55   | 0.001 |
| Feldspar       | Egan and Hilgeman (1979)          | 1.59   | 0     | 1.57   | 0     | 1.58   | 0     | 1.57   | 0     | 1.56   | 0     | 1.56   | 0     | 1.56   | 0     |
| Goethite       | Bedidi and Cervelle (1993)        | -      | -     | 2.4    | 0.078 | 2.29   | 0.125 | 2.24   | 0.082 | 2.2    | 0.108 | -      | -     | -      | -     |
| Hematite       | (O-RAY) - Querry (1985)           | 2.47   | 1.202 | 3.24   | 0.874 | 3.26   | 0.587 | 3.31   | 0.202 | 3.05   | 0.051 | 2.81   | 0.026 | 2.79   | 0.022 |
| Hematite       | (E-RAY) - Querry (1985)           | 2.24   | 1.034 | 2.86   | 0.758 | 2.88   | 0.532 | 2.93   | 0.229 | 2.74   | 0.096 | 2.55   | 0.057 | 2.53   | 0.051 |
| Hematite       | Longtin et al. (1988)             | 2.56   | 0.793 | 2.99   | 0.274 | 3.1    | 0.149 | 3.06   | 0.053 | 2.97   | 0.006 | 2.73   | 0.004 | 2.71   | 0.002 |
| Hematite       | Bedidi and Cervelle (1993)        | -      | -     | 3.26   | 0.298 | 3.29   | 0.228 | 3.13   | 0.244 | 2.98   | 0.17  | -      | -     | -      | -     |
| Hematite       | Triaud (2005)                     | 2.15   | 1.049 | 2.91   | 0.862 | 3.07   | 0.634 | 2.94   | 0.322 | 2.84   | 0.23  | 2.71   | 0.132 | 2.69   | 0.117 |
| Magnetite      | Querry (1985)                     | 2.45   | 0.108 | 2.37   | 0.054 | 2.35   | 0.083 | 2.34   | 0.131 | 2.36   | 0.137 | 2.21   | 0.173 | 2.16   | 0.234 |
| Magnetite      | Huffman and Stapp (1973)          | 2.34   | 0.843 | 2.47   | 0.698 | 2.51   | 0.634 | 2.55   | 0.578 | 2.56   | 0.498 | 2.42   | 0.37  | 2.35   | 0.415 |
| Olivine        | Fabian et al. (2001)              | -      | -     | 1.85   | 0.001 | 1.85   | 0.001 | 1.85   | 0.001 | 1.85   | 0.001 | 1.85   | 0.001 | 1.85   | 0.002 |
| Quartz         | Gao et al. (2013)                 | 1.49   | 0     | 1.48   | 0     | 1.48   | 0     | 1.48   | 0     | 1.48   | 0     | 1.47   | 0     | 1.47   | 0     |
| Quartz         | Rodríguez-de Marcos et al. (2016) | 1.48   | 0.003 | 1.47   | 0.002 | 1.47   | 0.002 | 1.46   | 0.002 | 1.46   | 0.002 | 1.46   | 0.001 | 1.46   | 0.001 |
| Quartz         | Lemarchand (2013)                 | 1.49   | 0     | 1.48   | 0     | 1.48   | 0     | 1.47   | 0     | 1.47   | 0     | 1.47   | 0     | 1.47   | 0     |
| Quartz glass   | Khashan and Nasif (2001)          | 1.51   | 0     | 1.53   | 0     | 1.51   | 0     | 1.51   | 0     | 1.51   | 0     | 1.56   | 0     | 1.55   | 0     |
| Quartz glass   | Philip (1985)                     | 1.54   | 0.001 | 1.53   | 0.002 | 1.53   | 0.002 | 1.53   | 0.002 | 1.53   | 0.002 | 1.52   | 0.004 | 1.51   | 0.004 |

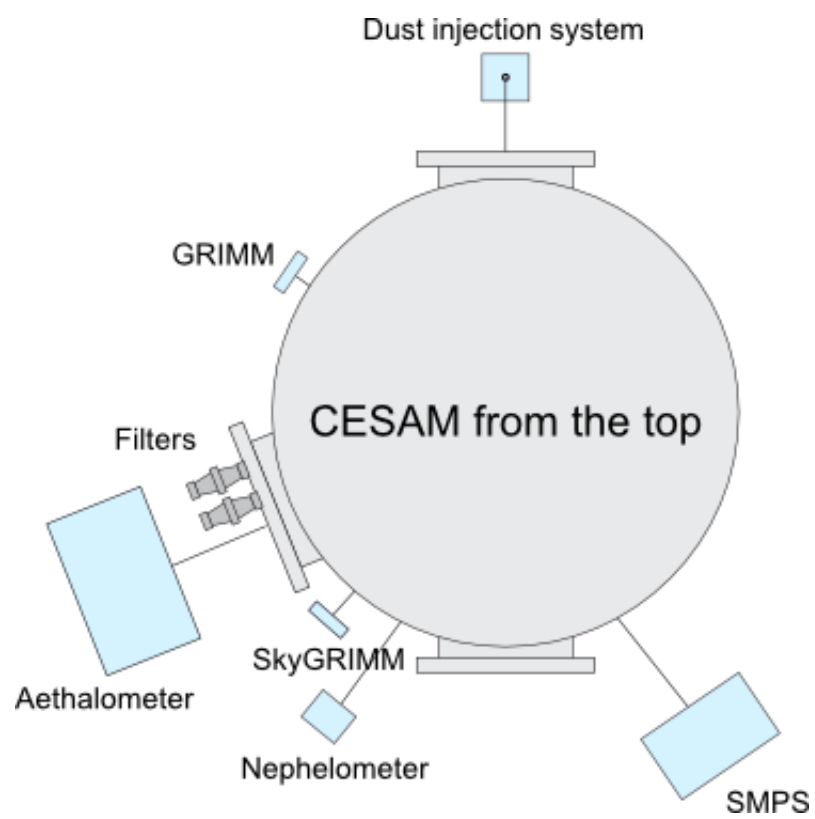

**Figure S1: Schematic diagram of the CESAM set up for the experiments on Icelandic dust.**

## Maeli2

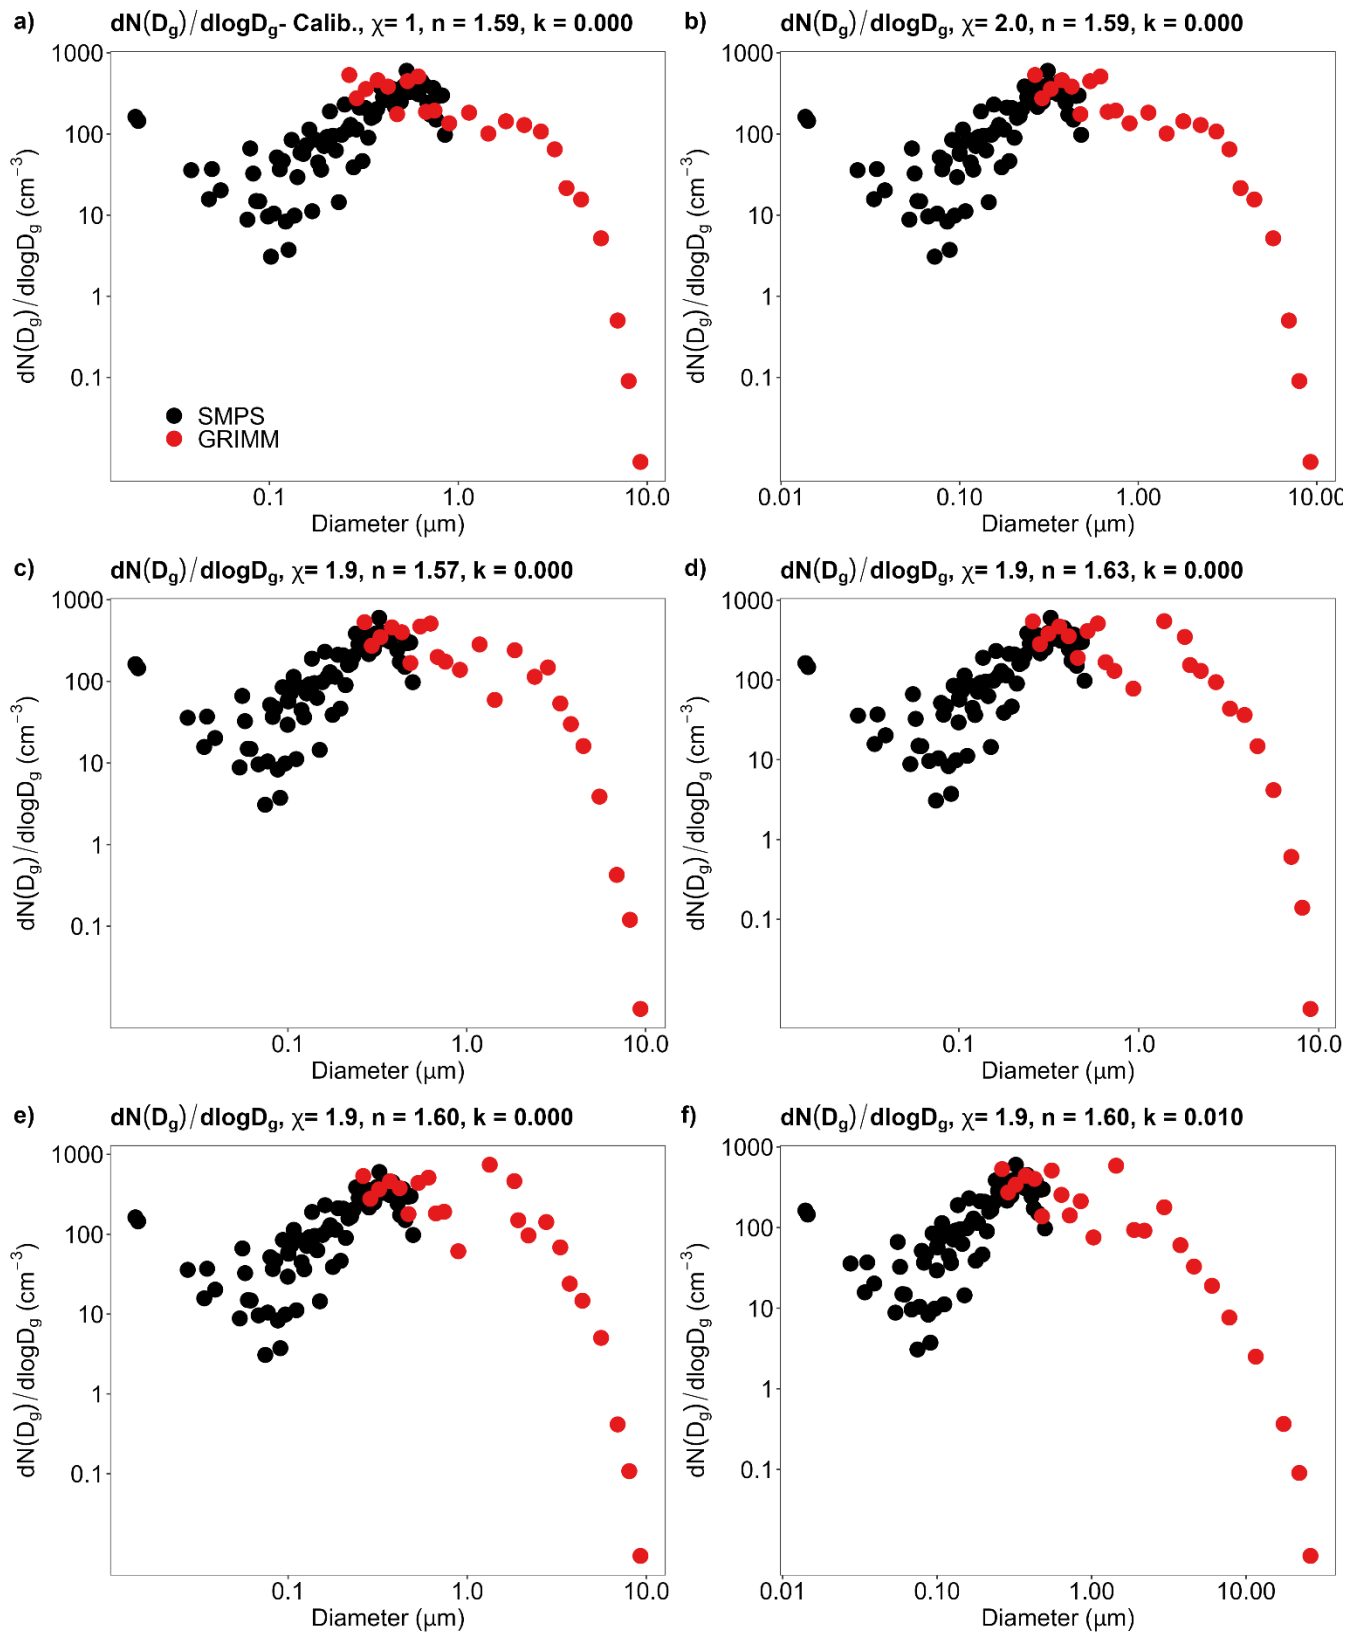

Figure S2: Geometrical size distributions  $dN(D_g)/d\log D_g$  at 30 min after the injection peak obtained a) using the calibration values of  $\chi$ ,  $n$  and  $k$ ; b-f) for different  $\chi$ - $n$ - $k$  combinations.  $\chi$  is the dynamic shape factor used to convert the mobility diameter  $D_m$  measured by the SMPS into geometrical diameters  $D_g$ .  $n$  and  $k$  are respectively the real and imaginary part of the complex refractive index used to convert the optical diameter  $D_{op}$  measured by the GRIMM into  $D_g$ . Sample ID: Maeli2.



## Maeli2

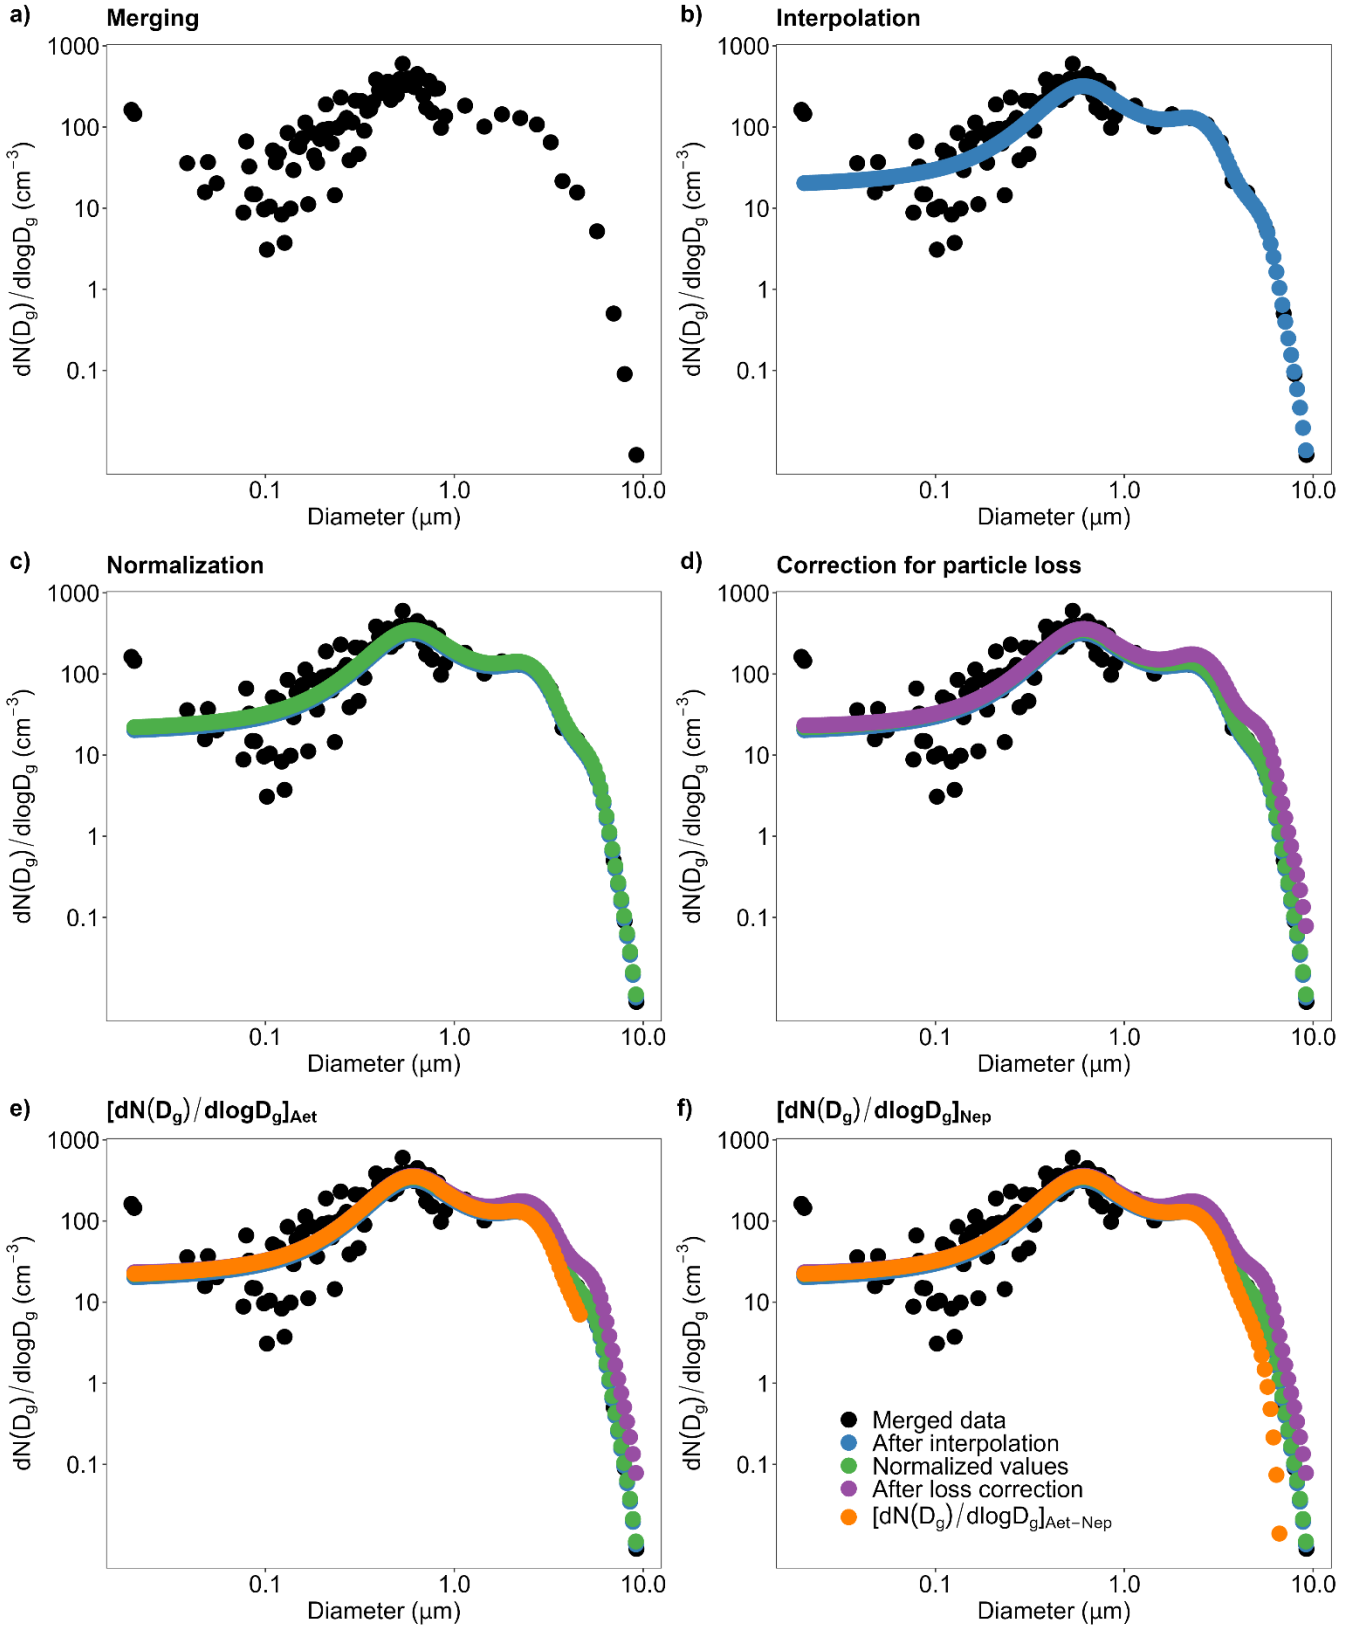

**Figure S3: Processing of size distribution data.** Geometrical size distributions  $dN(D_g)/d\log D_g$  at 30 min after the injection peak obtained using the calibration values of the parameters  $\chi$ ,  $n$ , and  $k$ . a) Merging of the geometrical size distributions  $dN/d\log D_g$  of SMPS and GRIMM; b) Interpolation of the merged size distribution; c) Normalization; d) Correction for particle loss to determine the real size distribution in CESAM. e-f) Size distribution of particles sampled by Shortwave Optical Properties Analyzers (SW-OPAs) aethalometer (e) and nephelometer (f). Sample ID: Maeli2.

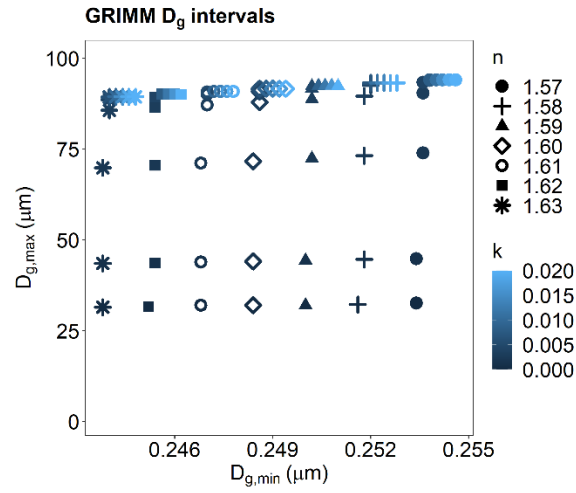

**Figure S4: GRIMM  $D_g$  intervals.**  $D_{g,max}$  and  $D_{g,min}$  are the upper and lower limit of the  $D_g$  intervals.  $n$  and  $k$  are respectively the real and imaginary part of the complex refractive indices used to convert the optical diameter  $D_{op}$  measured by the GRIMM into geometrical diameters  $D_g$ .

## Maeli2

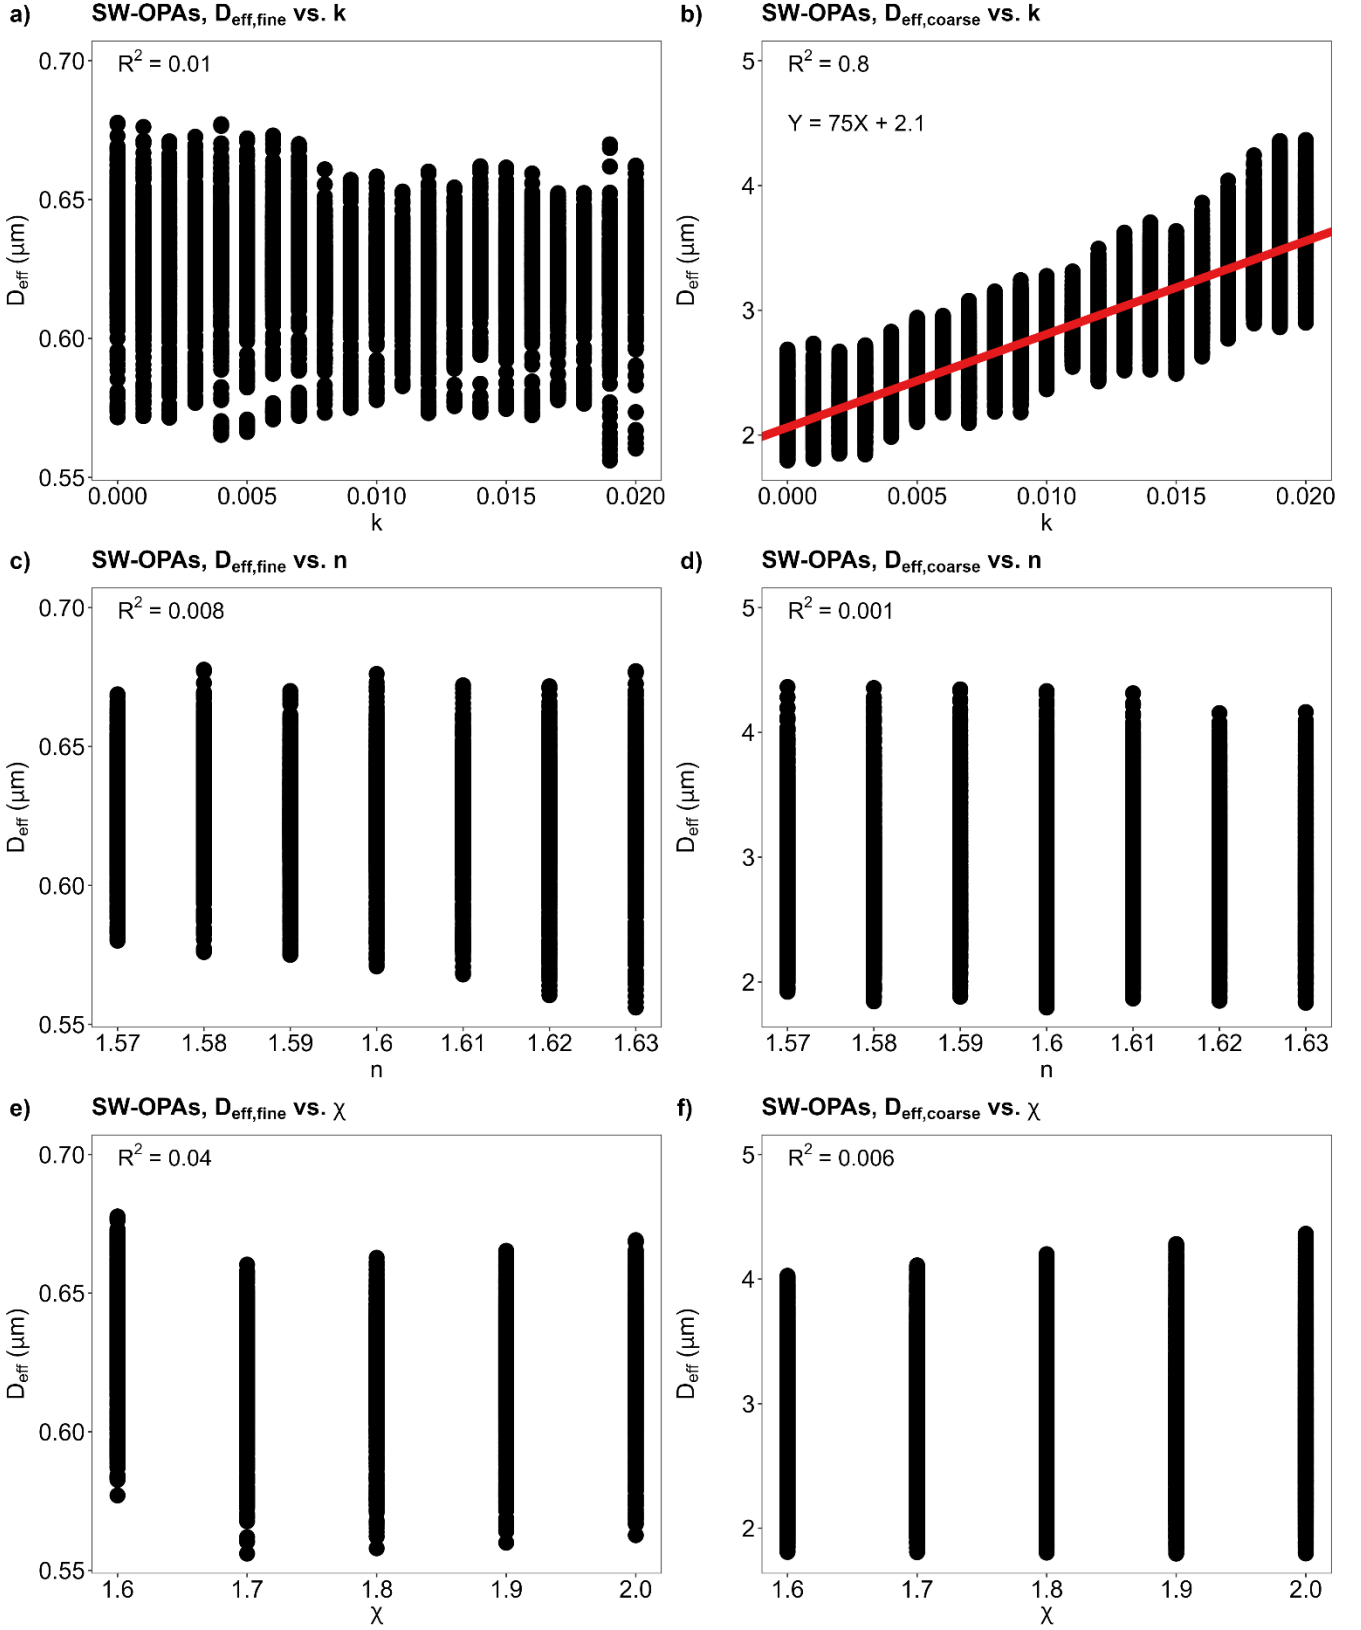

**Figure S5:** Comparison between the effective diameter of the coarse fractions ( $D_{\text{eff,coarse}}$ ) and of the fine fractions ( $D_{\text{eff,fine}}$ ) calculated using the SW-OPA size distributions and the input parameters  $\chi$ ,  $n$ , and  $k$ .

### D3

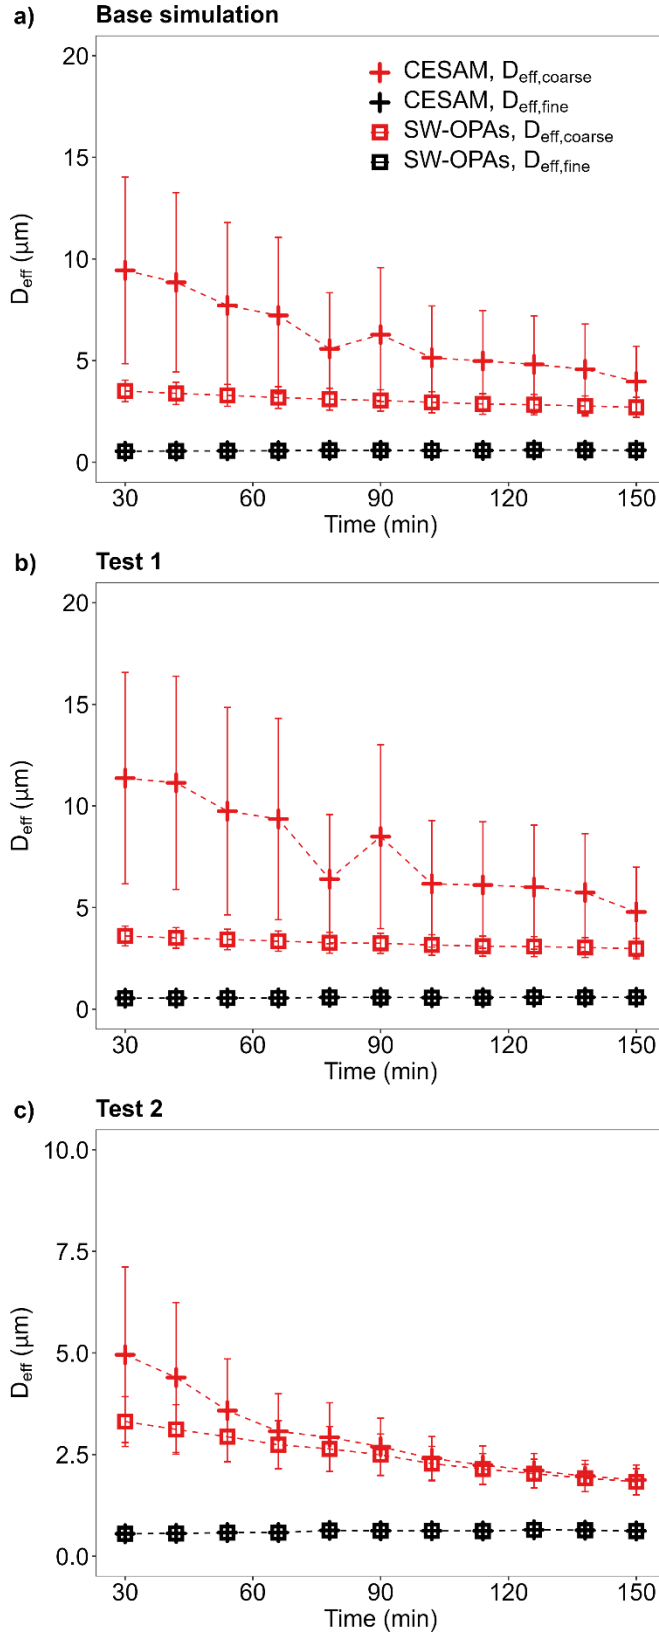

Figure S6: Effective diameters  $D_{\text{eff}}$  of dust particles sampled by the SW-OPAs and in CESAM, from 30 min after the injection peak to 2.5 h. a) Base simulation; b) Test 1; c) Test 2.  $D_{\text{eff}}$  was calculated for particles  $> 1 \mu\text{m}$  ( $D_{\text{eff,coarse}}$ ) and  $\leq 1 \mu\text{m}$  ( $D_{\text{eff,fine}}$ ). Data were reported as 12-min average. In Test 1, corrections and calculations were performed using the SMPS and GRIMM data plus 1 SD uncertainty. In Test 2, we used the SMPS and GRIMM data minus 1 SD uncertainty (see section 2.2.1 in the main text for details). Sample ID: D3.

## H55

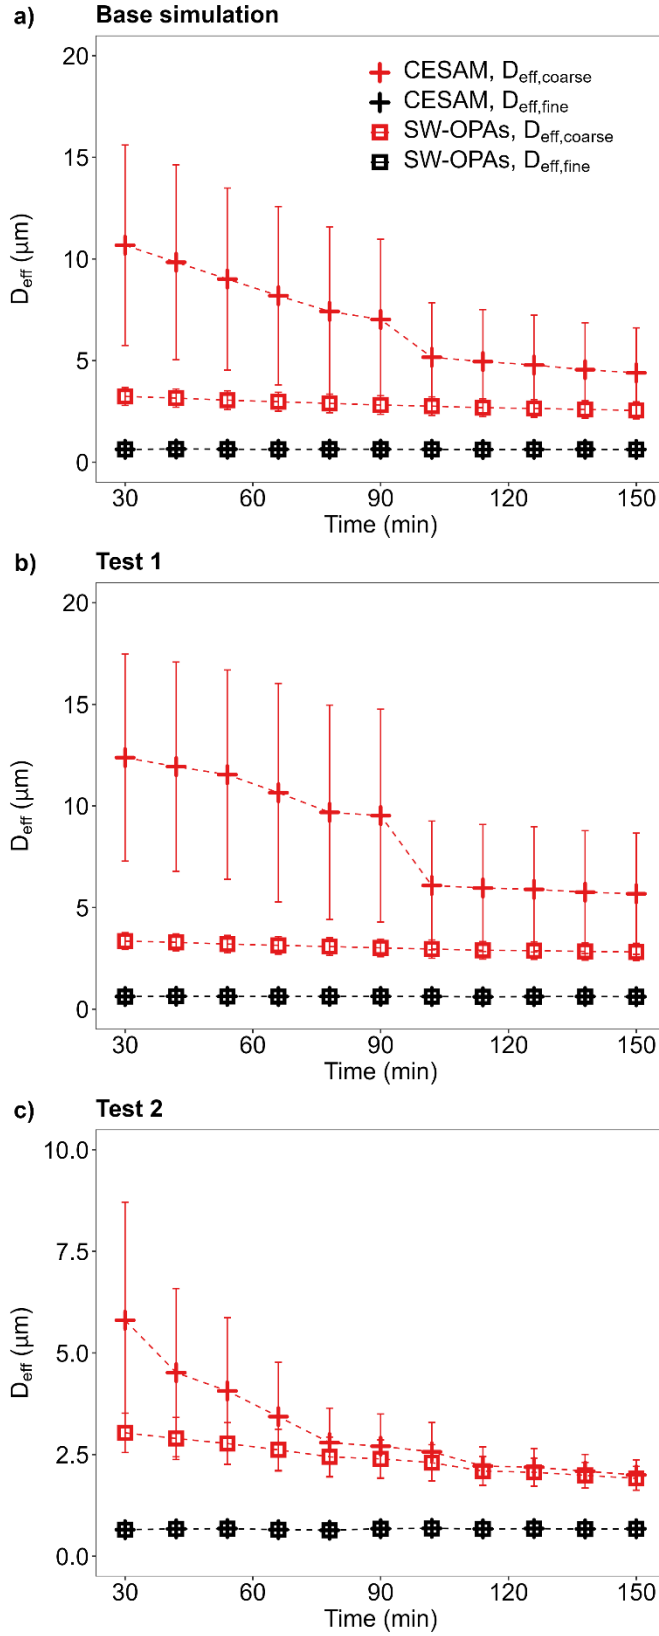

Figure S7: Effective diameters  $D_{\text{eff}}$  of dust particles sampled by the SW-OPAs and in CESAM, from 30 min after the injection peak to 2.5 h. a) Base simulation; b) Test 1; c) Test 2.  $D_{\text{eff}}$  was calculated for particles  $> 1 \mu\text{m}$  ( $D_{\text{eff,coarse}}$ ) and  $\leq 1 \mu\text{m}$  ( $D_{\text{eff,fine}}$ ). Data were reported as 12-min average. In Test 1, corrections and calculations were performed using the SMPS and GRIMM data plus 1 SD uncertainty. In Test 2, we used the SMPS and GRIMM data minus 1 SD uncertainty (see section 2.2.1 in the main text for details). Sample ID: H55.

## Land1

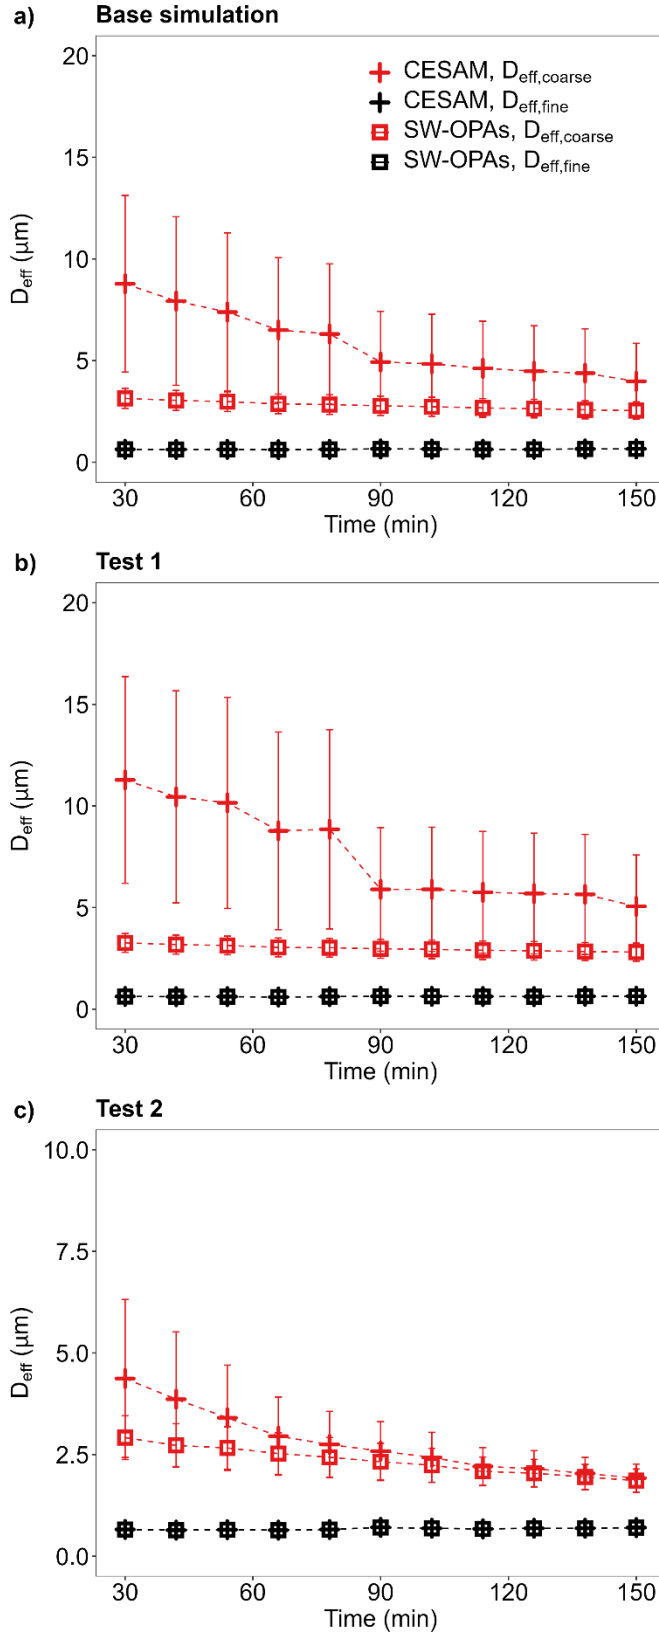

**Figure S8: Effective diameters  $D_{\text{eff}}$  of dust particles sampled by the SW-OPAs and in CESAM, from 30 min after the injection peak to 2.5 h. a) Base simulation; b) Test 1; c) Test 2.  $D_{\text{eff}}$  was calculated for particles  $> 1 \mu\text{m}$  ( $D_{\text{eff,coarse}}$ ) and  $\leq 1 \mu\text{m}$  ( $D_{\text{eff,fine}}$ ). Data were reported as 12-min average. In Test 1, corrections and calculations were performed using the SMPS and GRIMM data plus 1 SD uncertainty. In Test 2, we used the SMPS and GRIMM data minus 1 SD uncertainty (see section 2.2.1 in the main text for details). Sample ID: Land1.**

## Maeli2

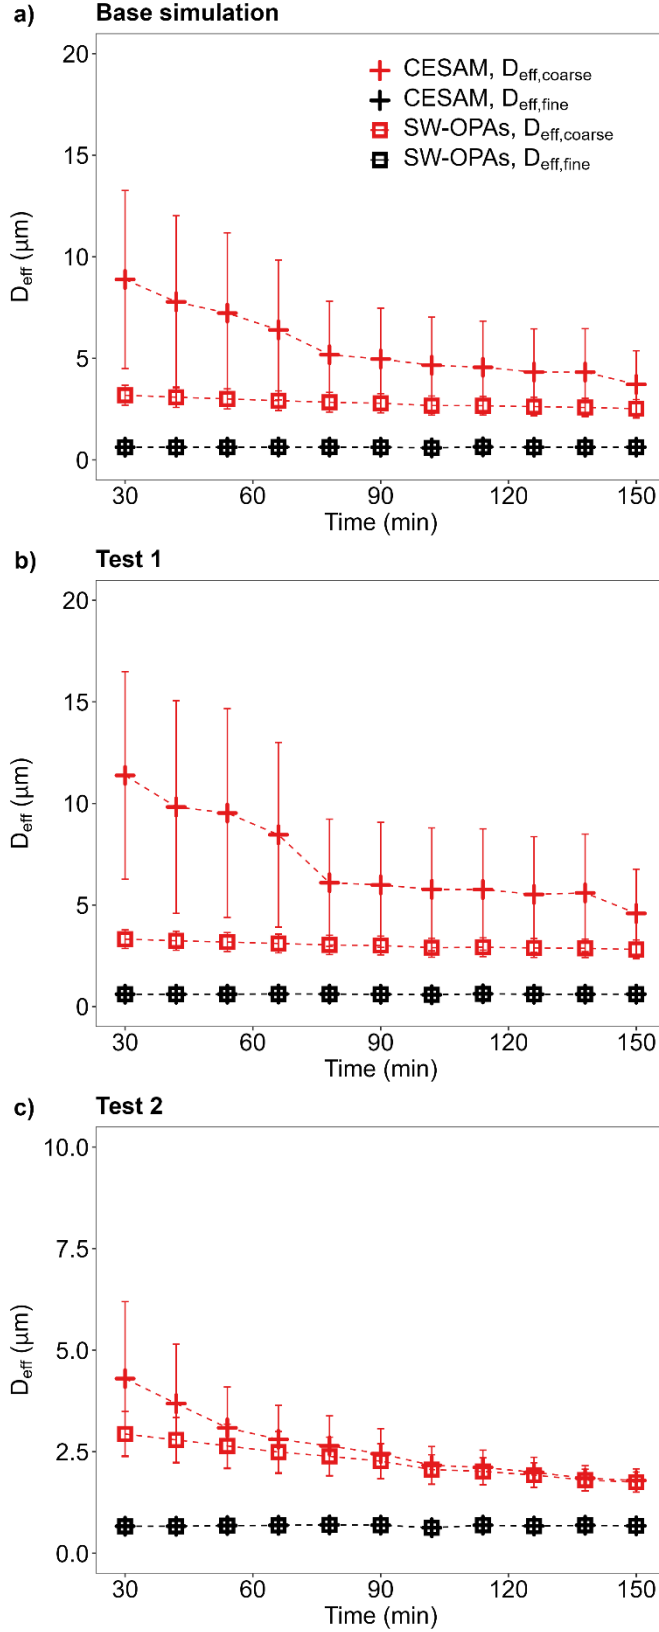

Figure S9: Effective diameters  $D_{\text{eff}}$  of dust particles sampled by the SW-OPAs and in CESAM, from 30 min after the injection peak to 2.5 h. a) Base simulation; b) Test 1; c) Test 2.  $D_{\text{eff}}$  was calculated for particles  $> 1 \mu\text{m}$  ( $D_{\text{eff,coarse}}$ ) and  $\leq 1 \mu\text{m}$  ( $D_{\text{eff,fine}}$ ). Data were reported as 12-min average. In Test 1, corrections and calculations were performed using the SMPS and GRIMM data plus 1 SD uncertainty. In Test 2, we used the SMPS and GRIMM data minus 1 SD uncertainty (see section 2.2.1 in the main text for details). Sample ID: Maeli2.

## MIR45

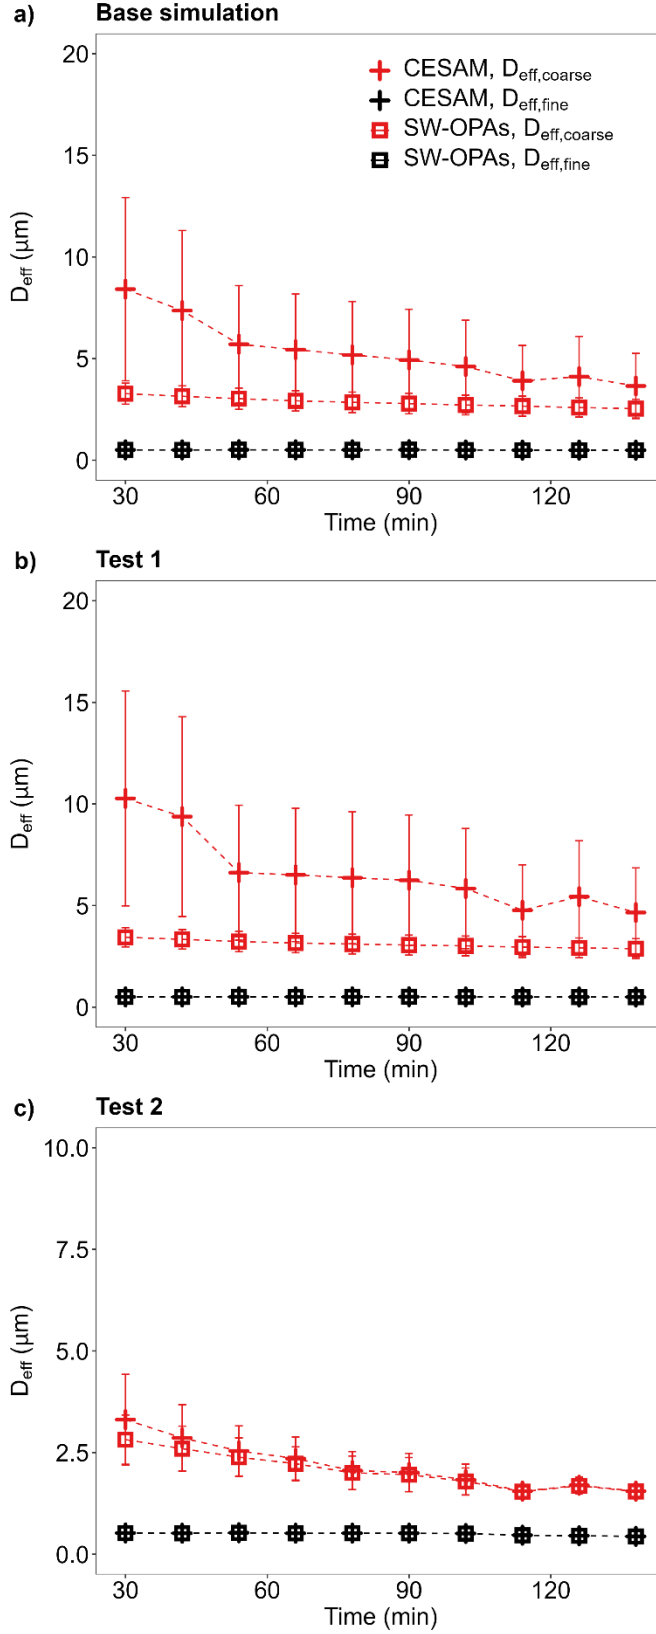

Figure S10: Effective diameters  $D_{\text{eff}}$  of dust particles sampled by the SW-OPAs and in CESAM, from 30 min after the injection peak to 2.5 h. a) Base simulation; b) Test 1; c) Test 2.  $D_{\text{eff}}$  was calculated for particles  $> 1 \mu\text{m}$  ( $D_{\text{eff,coarse}}$ ) and  $\leq 1 \mu\text{m}$  ( $D_{\text{eff,fine}}$ ). Data were reported as 12-min average. In Test 1, corrections and calculations were performed using the SMPS and GRIMM data plus 1 SD uncertainty. In Test 2, we used the SMPS and GRIMM data minus 1 SD uncertainty (see section 2.2.1 in the main text for details). Sample ID: MIR45.



D3

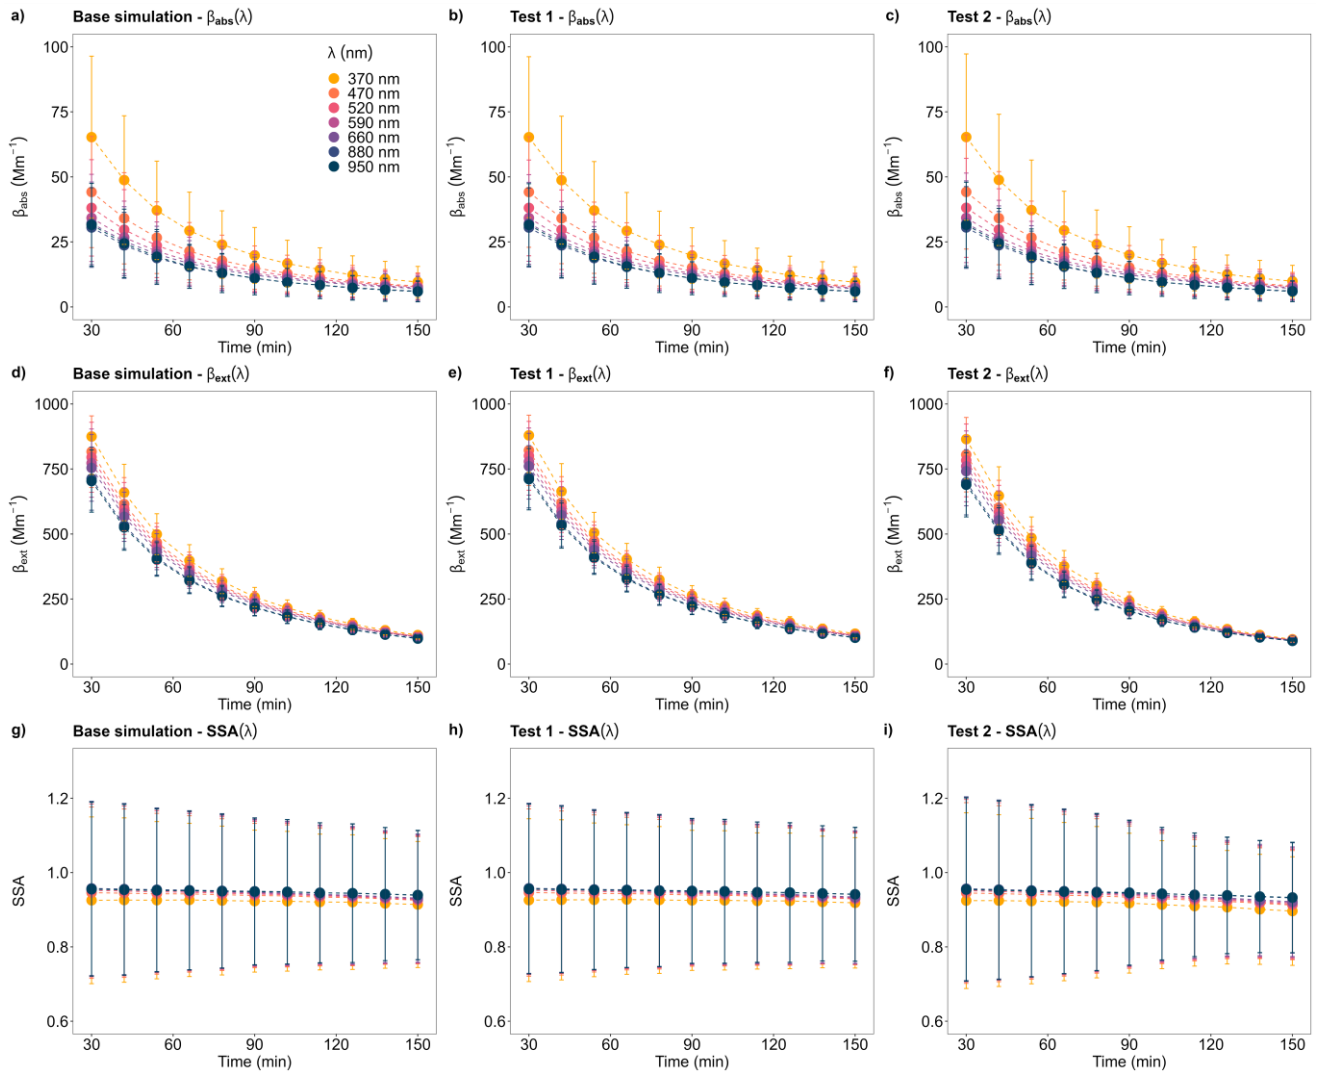

**Figure S11:** Extinction coefficient  $\beta_{\text{ext}}(\lambda)$ , absorption coefficient  $\beta_{\text{abs}}(\lambda)$ , and single scattering albedo  $\text{SSA}(\lambda)$  at  $\lambda = 370, 470, 520, 590, 660, 880, 950$  nm, from 30 min after the injection peak to 2.5 h. a-c) Base simulation; d-f) Test 1; g-i) Test 2. Data were reported as 12-min average. In Test 1, corrections and calculations were performed using the SMPS and GRIMM data plus 1 SD uncertainty. In Test 2, we used the SMPS and GRIMM data minus 1 SD uncertainty (see section 2.2.1 in the main text for details). Sample ID: D3.

H55

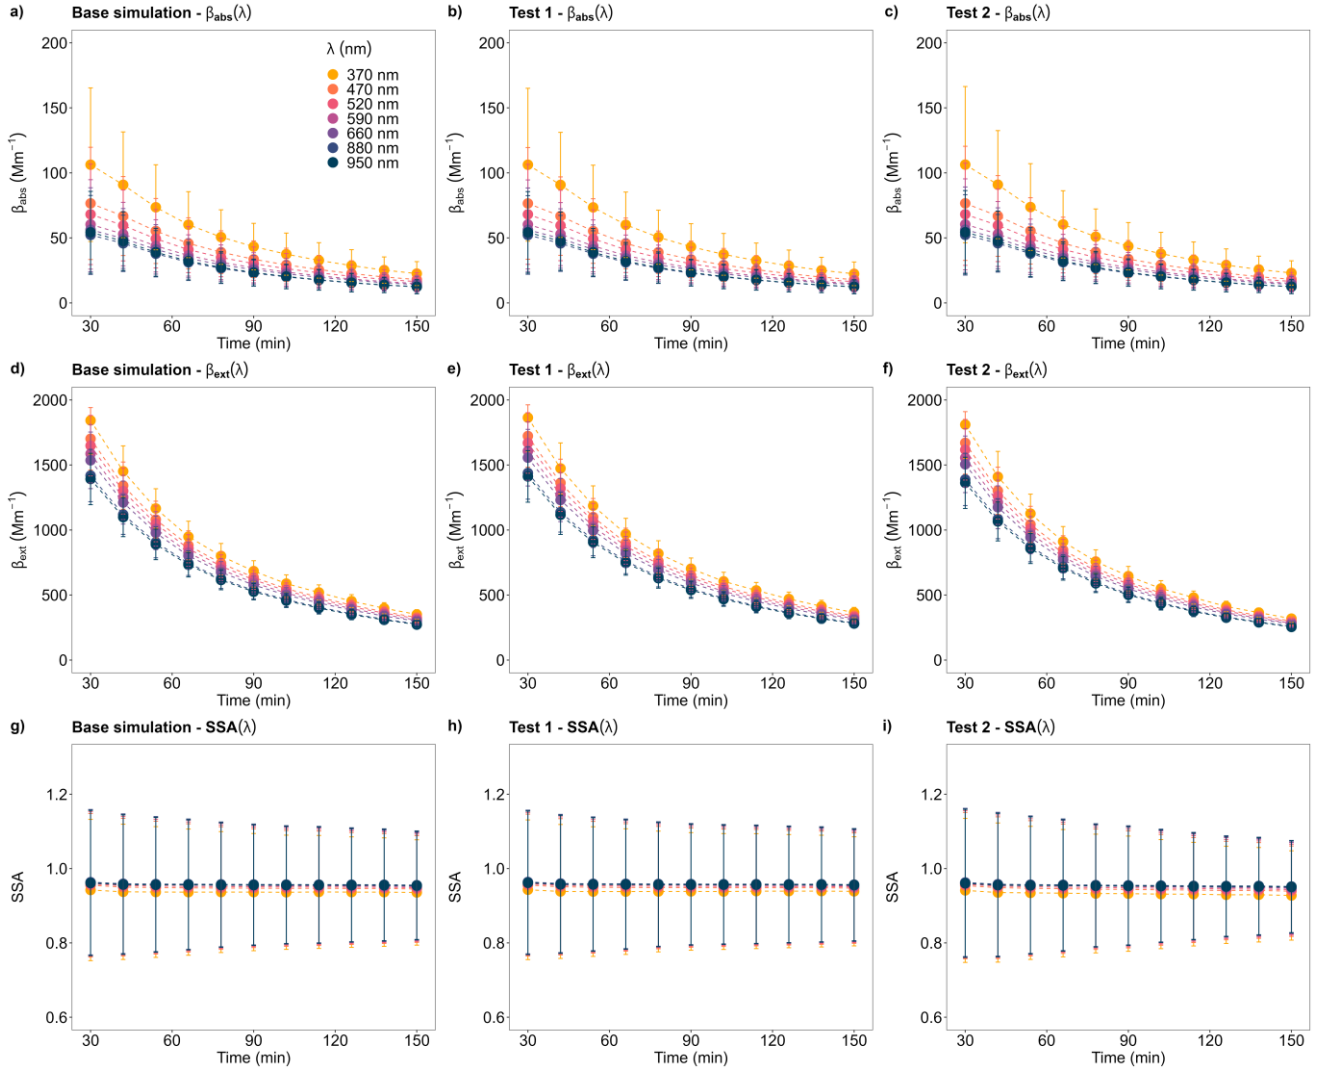

**Figure S12:** Extinction coefficient  $\beta_{\text{ext}}(\lambda)$ , absorption coefficient  $\beta_{\text{abs}}(\lambda)$ , and single scattering albedo  $\text{SSA}(\lambda)$  at  $\lambda = 370, 470, 520, 590, 660, 880, 950$  nm, from 30 min after the injection peak to 2.5 h. a-c) Base simulation; d-f) Test 1; g-i) Test 2. Data were reported as 12-min average. In Test 1, corrections and calculations were performed using the SMPS and GRIMM data plus 1 SD uncertainty. In Test 2, we used the SMPS and GRIMM data minus 1 SD uncertainty (see section 2.2.1 in the main text for details). Sample ID: H55.

# Land1

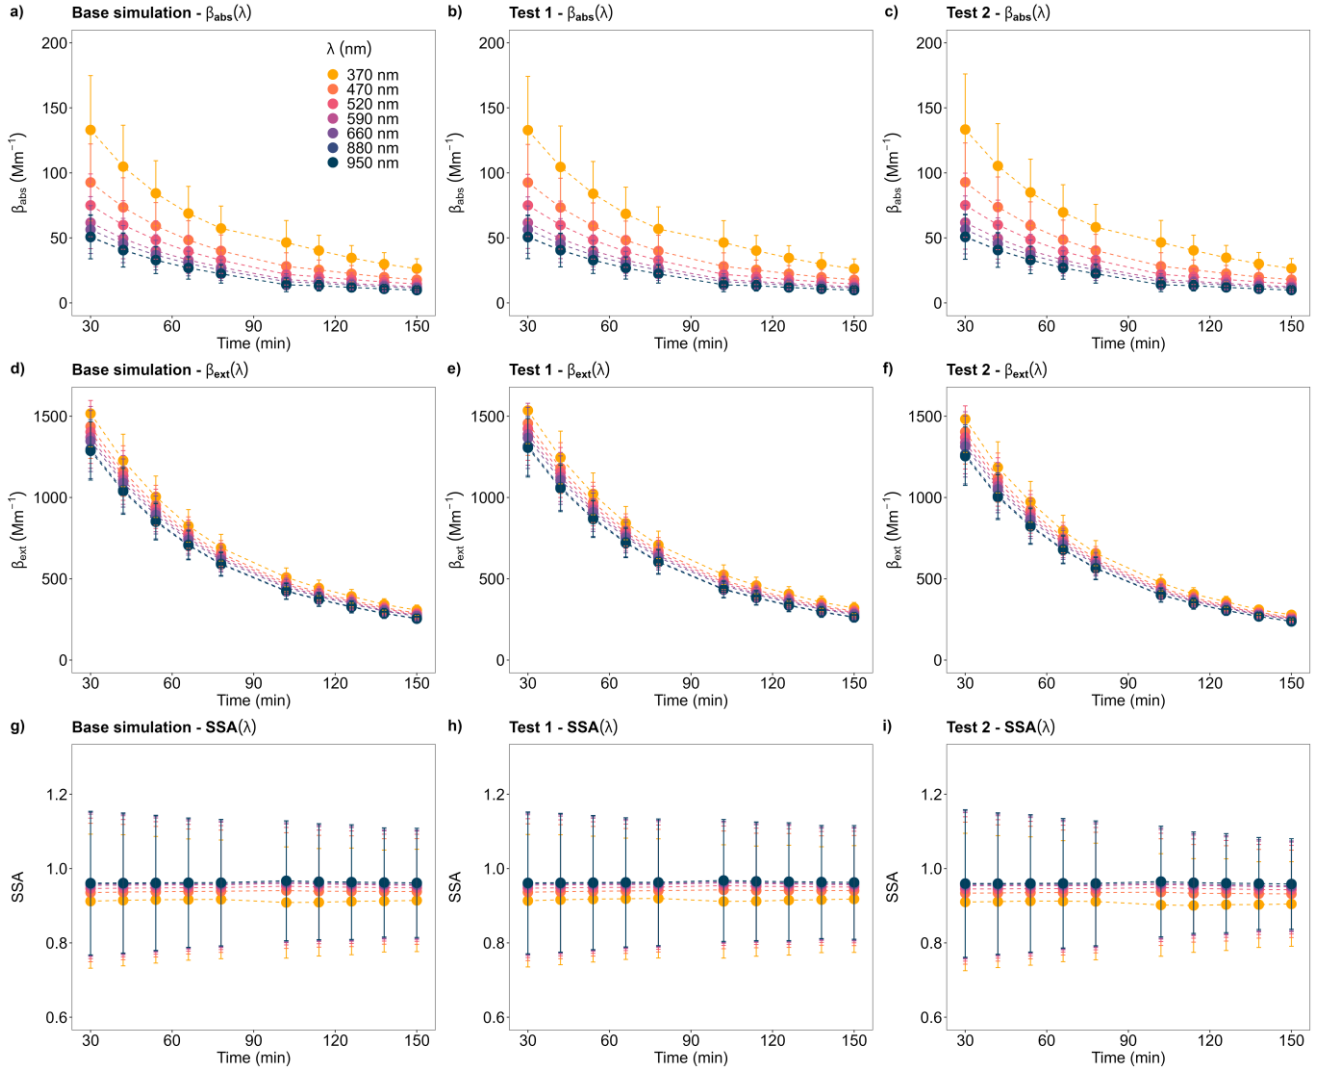

**Figure S13:** Extinction coefficient  $\beta_{\text{ext}}(\lambda)$ , absorption coefficient  $\beta_{\text{abs}}(\lambda)$ , and single scattering albedo  $\text{SSA}(\lambda)$  at  $\lambda = 370, 470, 520, 590, 660, 880, 950$  nm, from 30 min after the injection peak to 2.5 h. a-c) Base simulation; d-f) Test 1; g-i) Test 2. Data were reported as 12-min average. In Test 1, corrections and calculations were performed using the SMPS and GRIMM data plus 1 SD uncertainty. In Test 2, we used the SMPS and GRIMM data minus 1 SD uncertainty (see section 2.2.1 in the main text for details). Sample ID: Land1.

## Maeli2

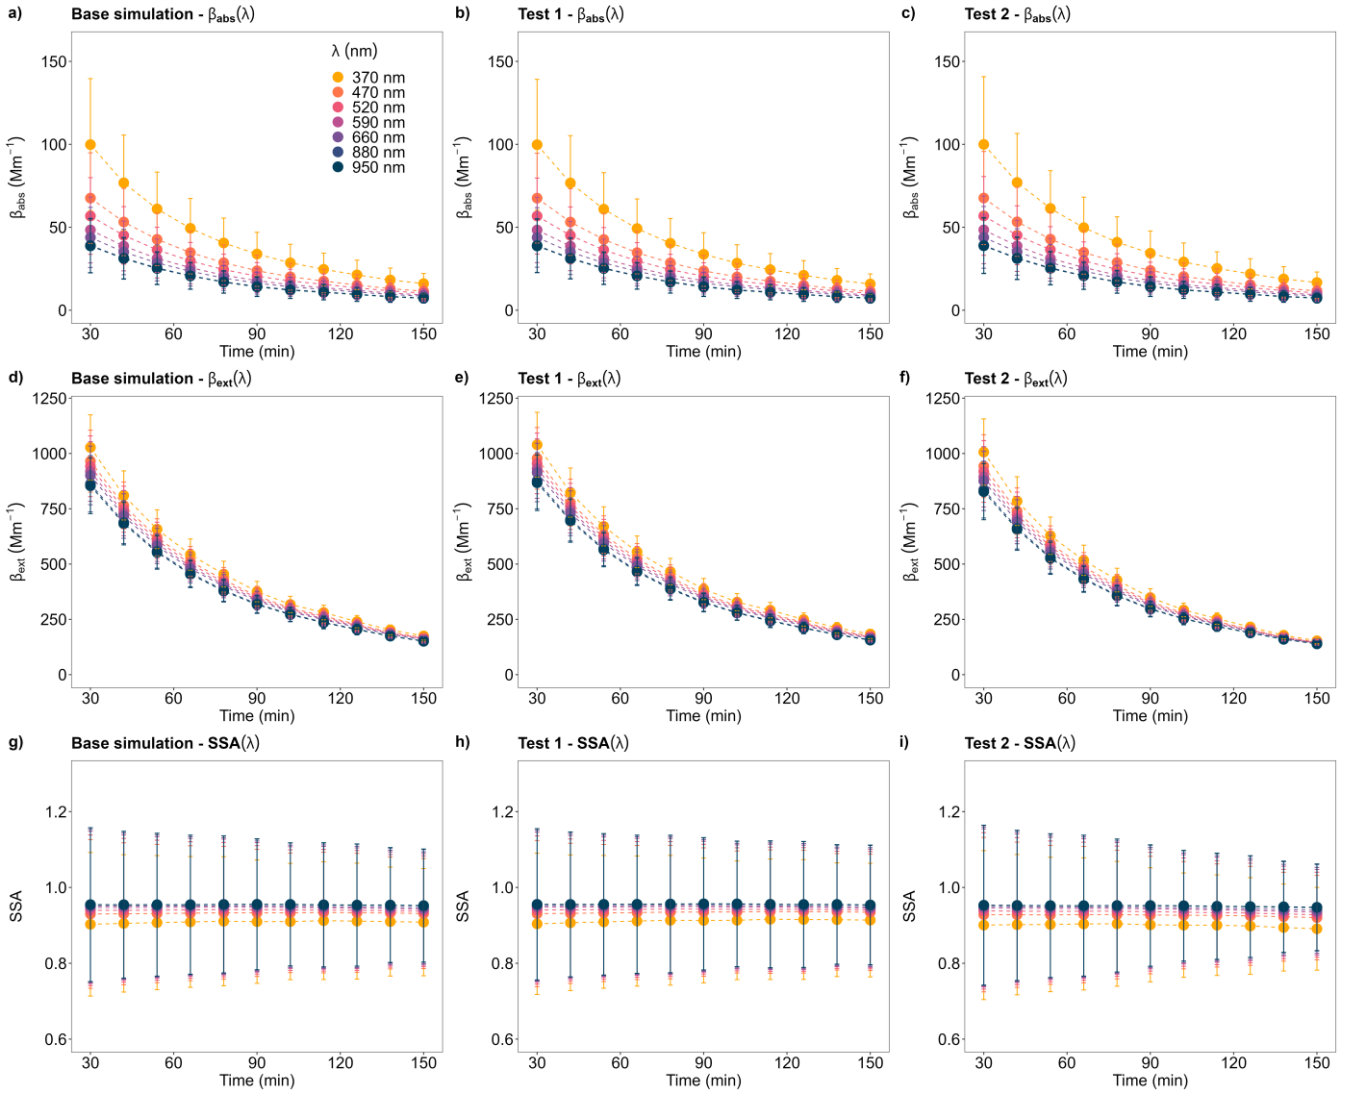

**Figure S14:** Extinction coefficient  $\beta_{\text{ext}}(\lambda)$ , absorption coefficient  $\beta_{\text{abs}}(\lambda)$ , and single scattering albedo  $\text{SSA}(\lambda)$  at  $\lambda = 370, 470, 520, 590, 660, 880, 950$  nm, from 30 min after the injection peak to 2.5 h. a-c) Base simulation; d-f) Test 1; g-i) Test 2. Data were reported as 12-min average. In Test 1, corrections and calculations were performed using the SMPS and GRIMM data plus 1 SD uncertainty. In Test 2, we used the SMPS and GRIMM data minus 1 SD uncertainty (see section 2.2.1 in the main text for details). Sample ID: Maeli2.

# MIR45

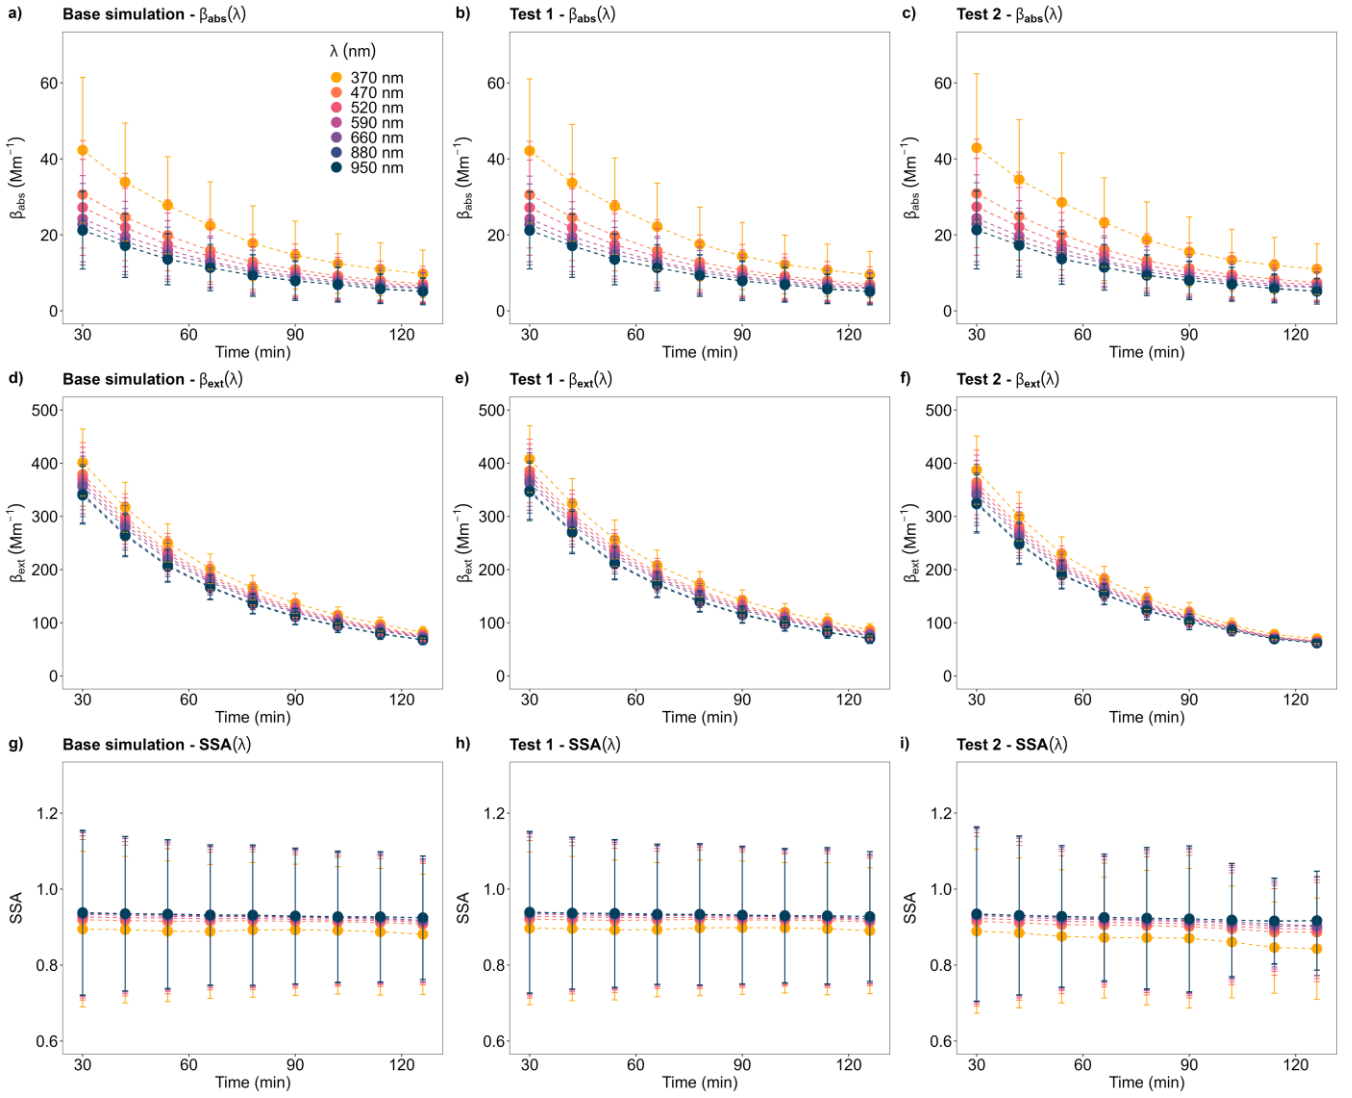

**Figure S15:** Extinction coefficient  $\beta_{ext}(\lambda)$ , absorption coefficient  $\beta_{abs}(\lambda)$ , and single scattering albedo  $SSA(\lambda)$  at  $\lambda = 370, 470, 520, 590, 660, 880, 950$  nm, from 30 min after the injection peak to 2.5 h. a-c) Base simulation; d-f) Test 1; g-i) Test 2. Data were reported as 12-min average. In Test 1, corrections and calculations were performed using the SMPS and GRIMM data plus 1 SD uncertainty. In Test 2, we used the SMPS and GRIMM data minus 1 SD uncertainty (see section 2.2.1 in the main text for details). Sample ID: MIR45.

### D3

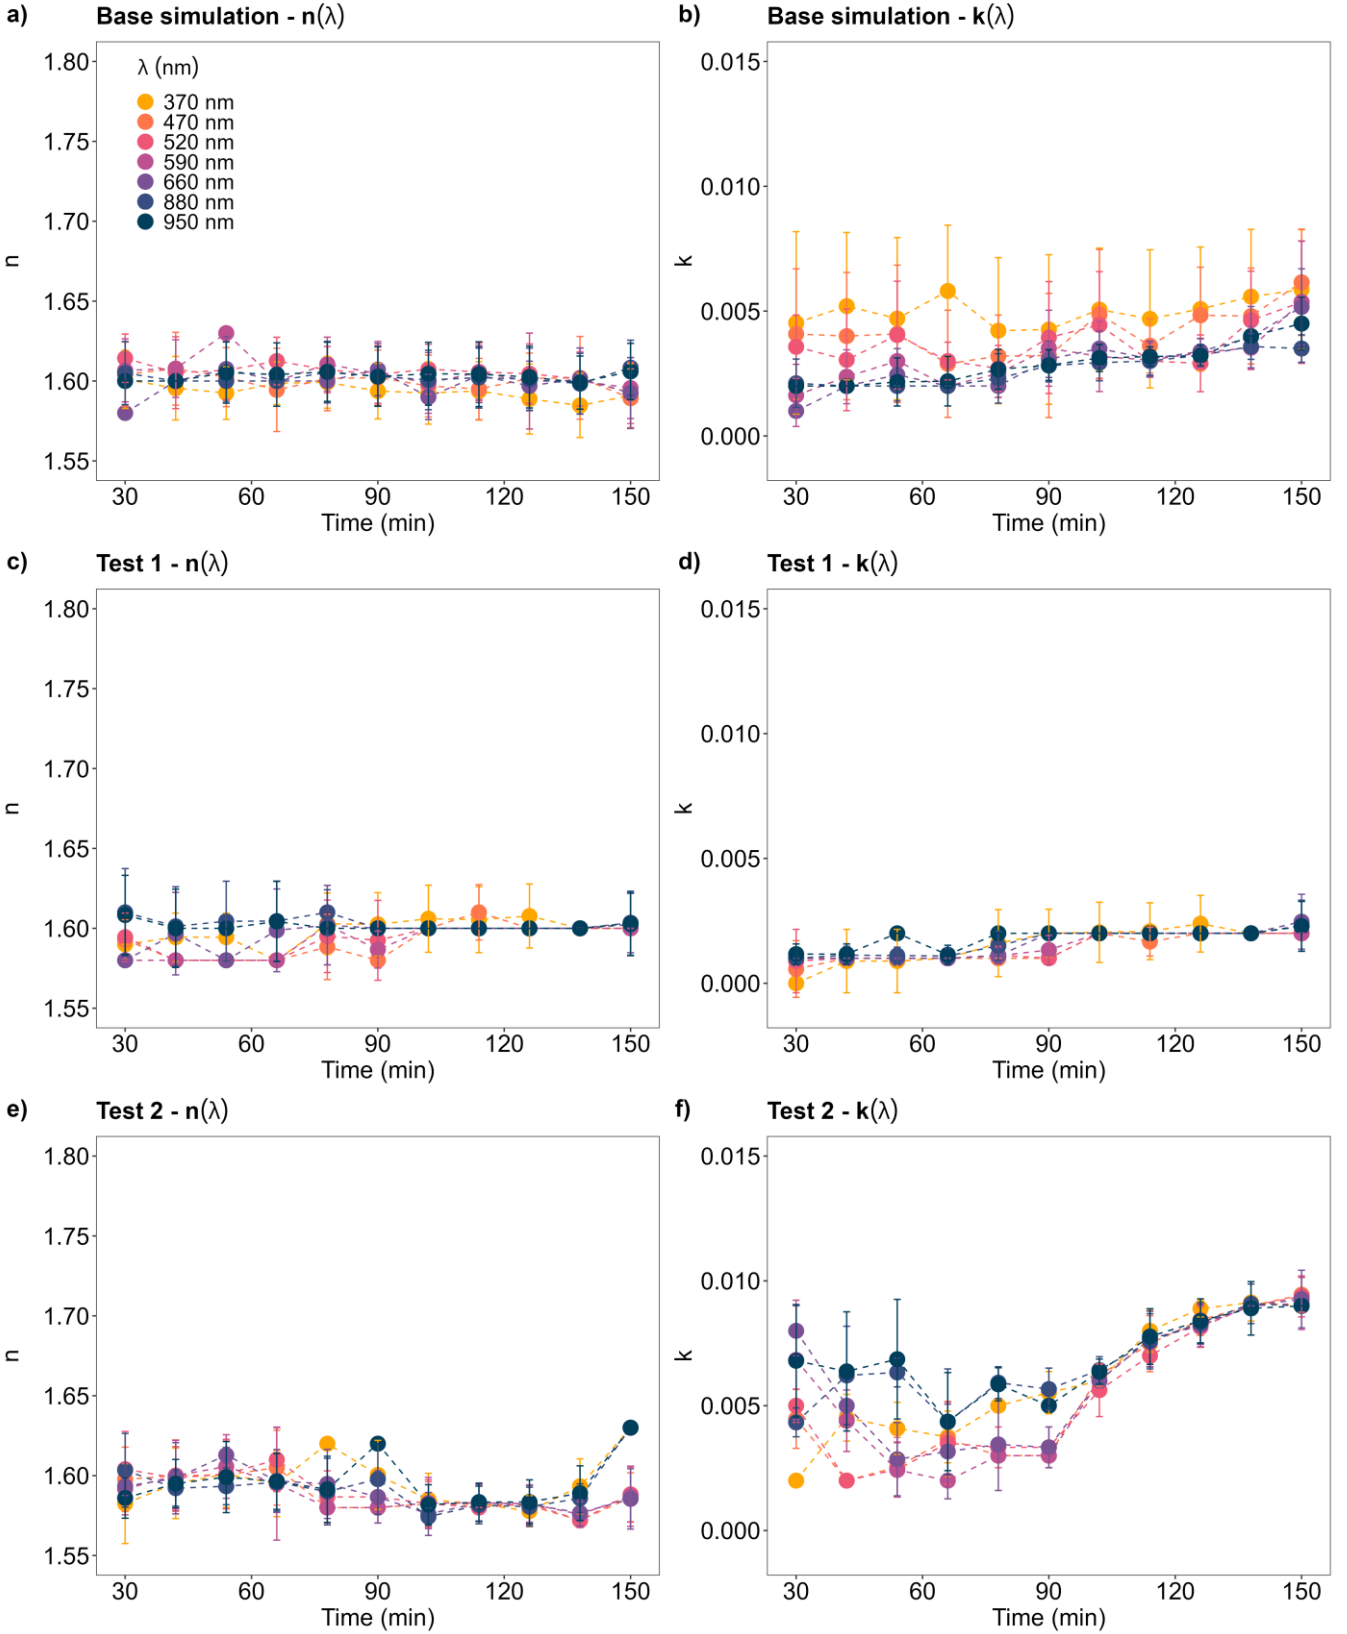

**Figure S16: Real index  $n(\lambda)$  and imaginary index  $k(\lambda)$  at  $\lambda = 370, 470, 520, 590, 660, 880, 950$  nm, from 30 min after the injection peak to 2.5 h. a-b) Base simulation; c-d) Test 1; e-f) Test 2. Data were retrieved at 12-min resolution. In Test 1, corrections and calculations were performed using the SMPS and GRIMM data plus 1 SD uncertainty. In Test 2, we used the SMPS and GRIMM data minus 1 SD uncertainty (see section 2.2.1 in the main text for details). Sample ID: D3.**

## H55

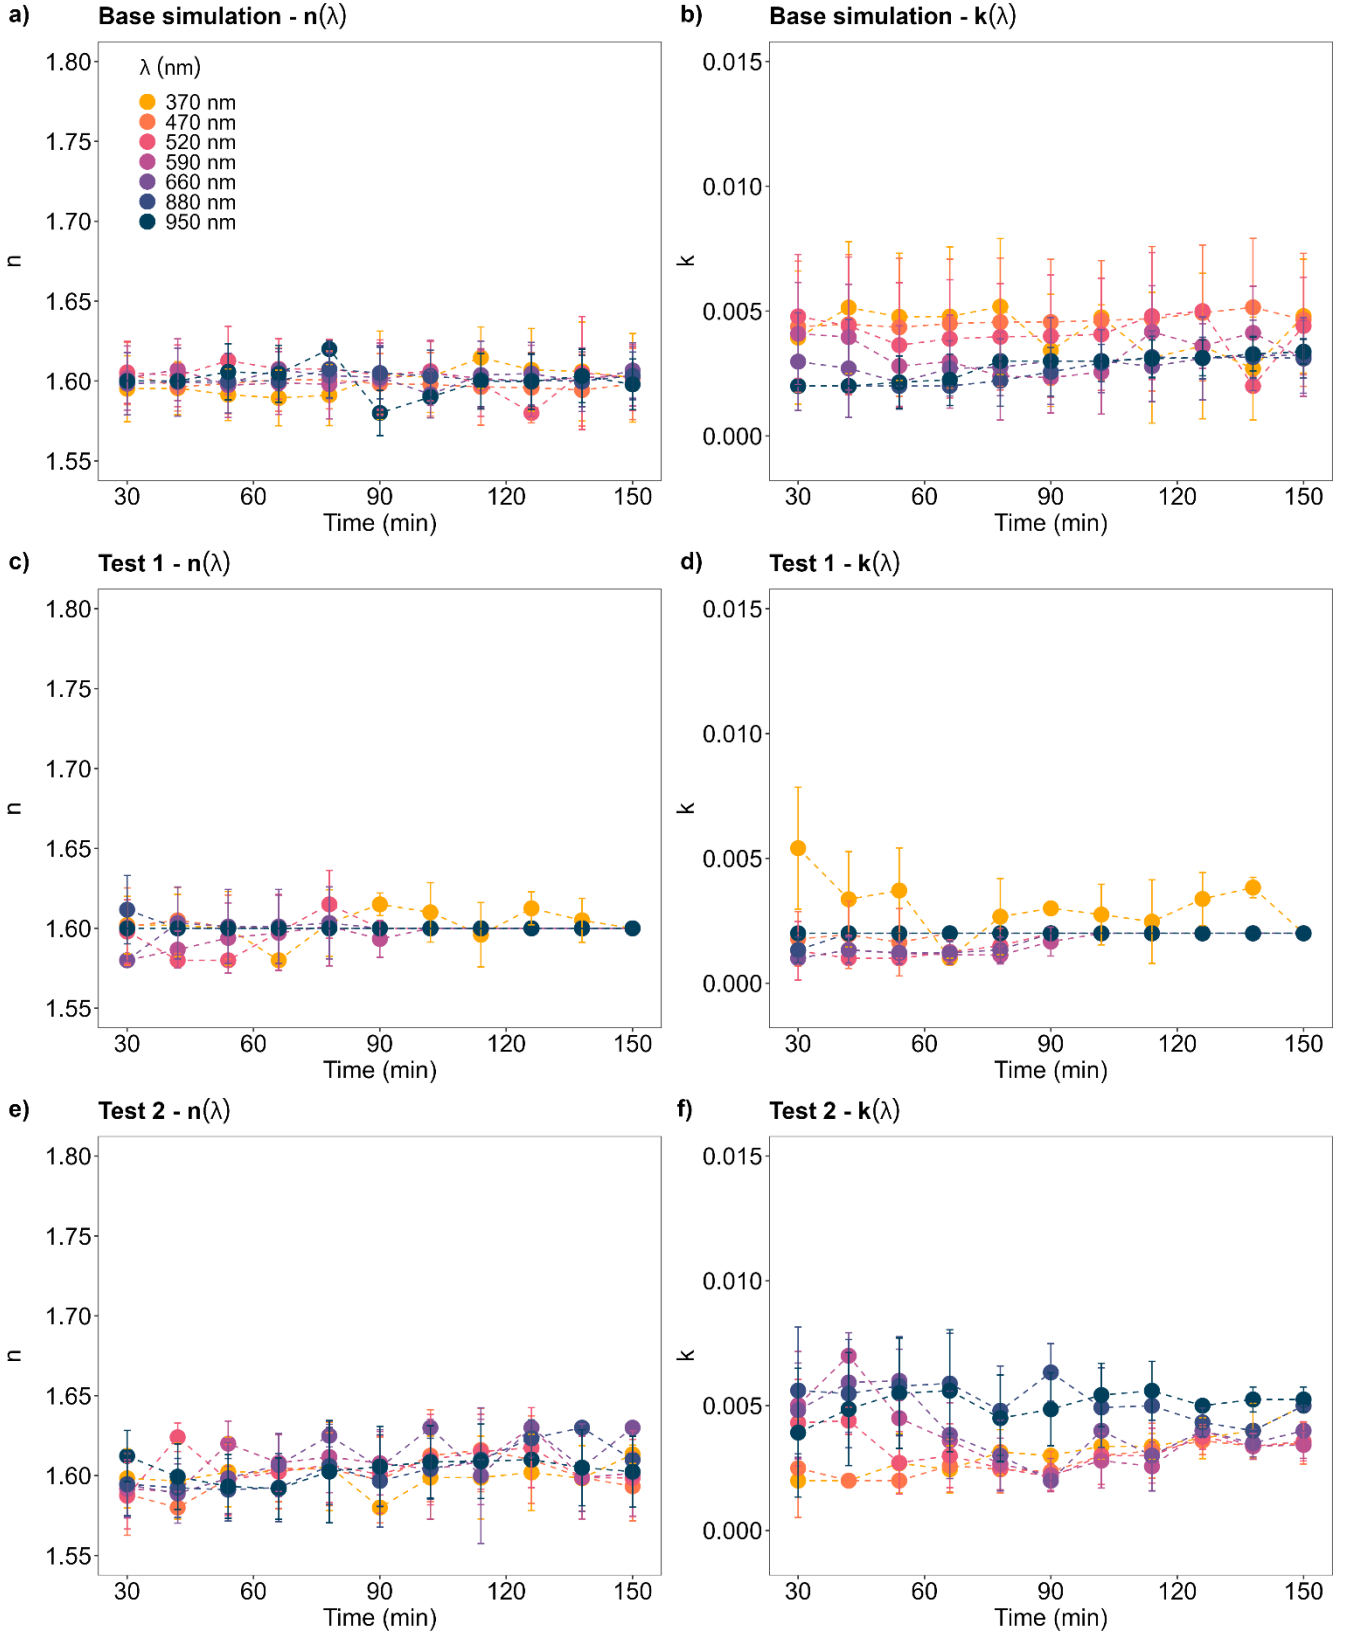

**Figure S17: Real index  $n(\lambda)$  and imaginary index  $k(\lambda)$  at  $\lambda = 370, 470, 520, 590, 660, 880, 950$  nm, from 30 min after the injection peak to 2.5 h. a-b) Base simulation; c-d) Test 1; e-f) Test 2. Data were retrieved at 12-min resolution. In Test 1, corrections and calculations were performed using the SMPS and GRIMM data plus 1 SD uncertainty. In Test 2, we used the SMPS and GRIMM data minus 1 SD uncertainty (see section 2.2.1 in the main text for details). Sample ID: H55.**

## Land1

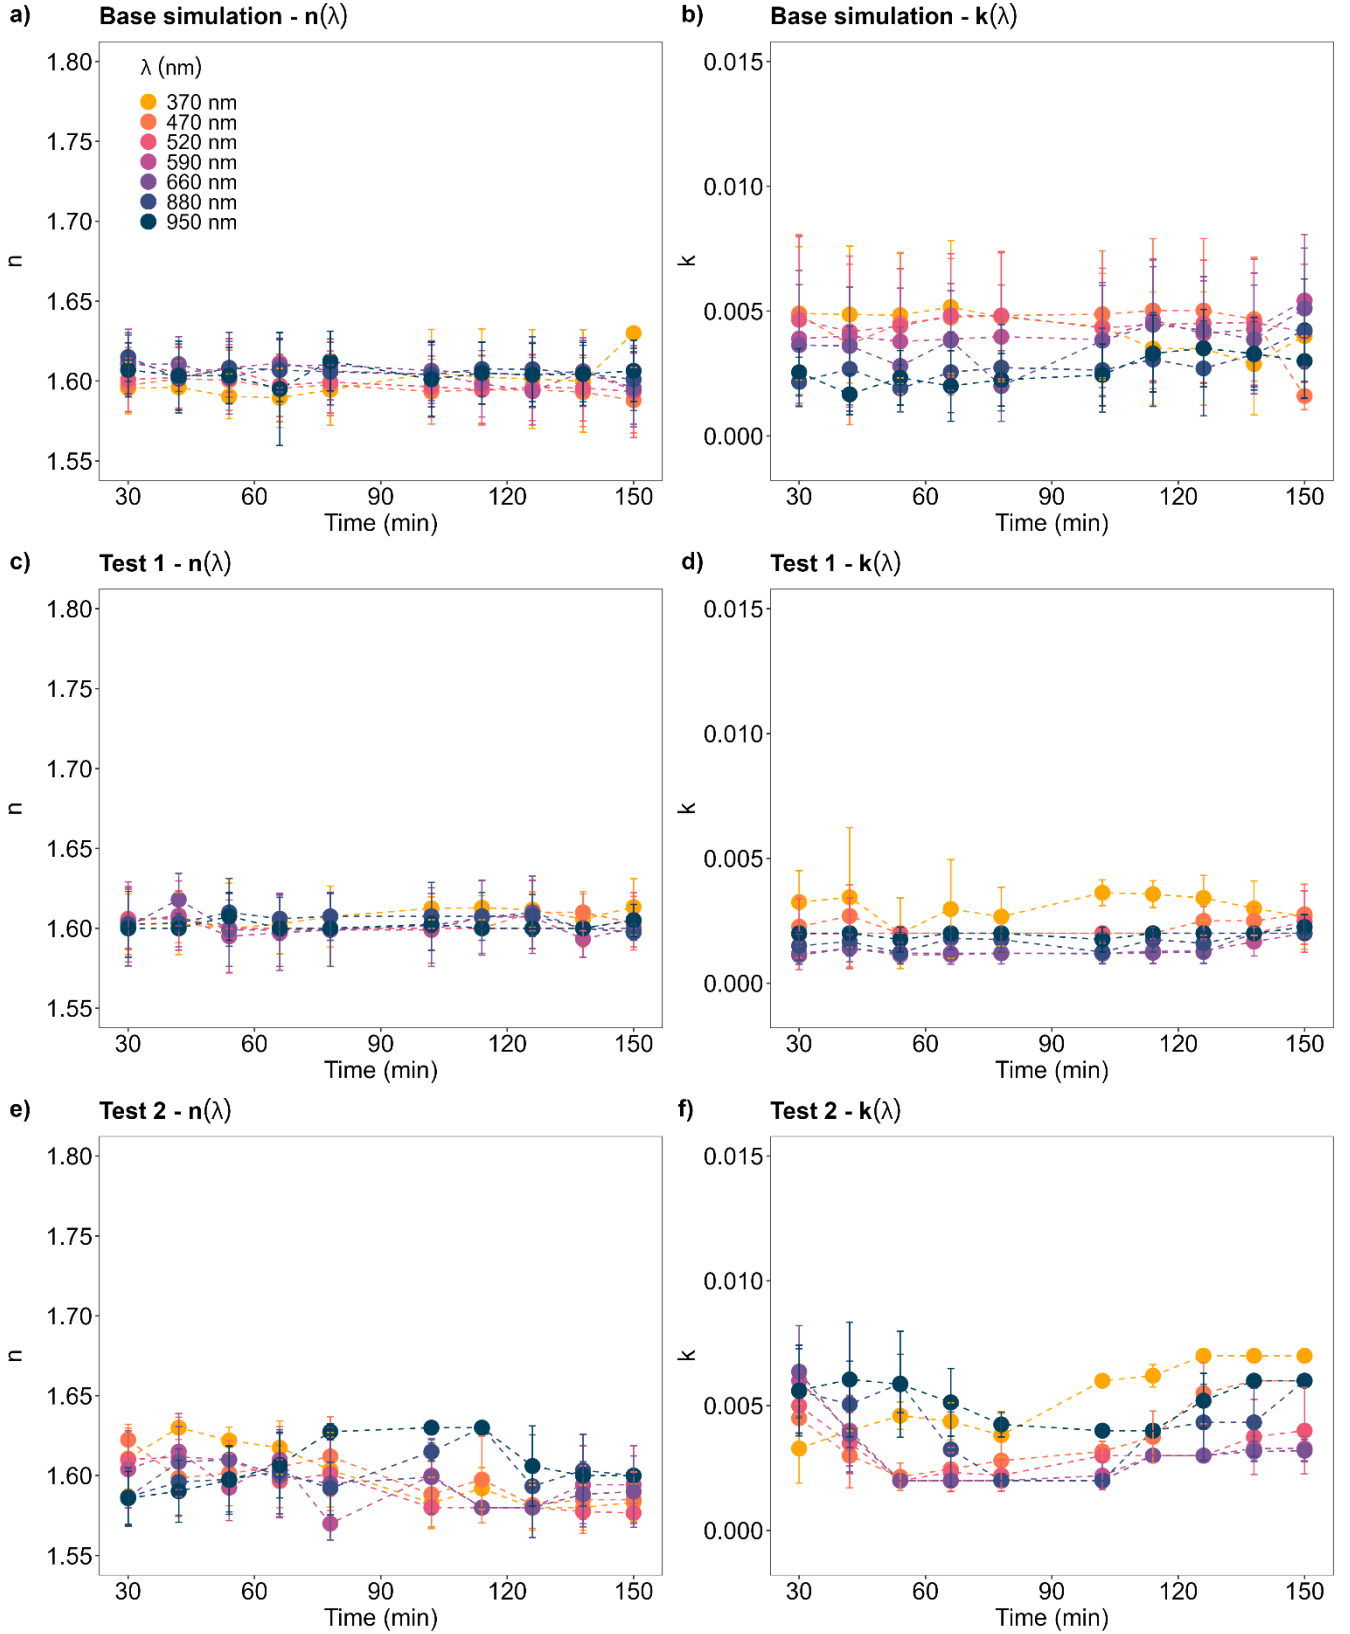

**Figure S18: Real index  $n(\lambda)$  and imaginary index  $k(\lambda)$  at  $\lambda = 370, 470, 520, 590, 660, 880, 950$  nm, from 30 min after the injection peak to 2.5 h. a-b) Base simulation; c-d) Test 1; e-f) Test 2. Data were retrieved at 12-min resolution. In Test 1, corrections and calculations were performed using the SMPS and GRIMM data plus 1 SD uncertainty. In Test 2, we used the SMPS and GRIMM data minus 1 SD uncertainty (see section 2.2.1 in the main text for details). Sample ID: Land1.**



## Maeli2

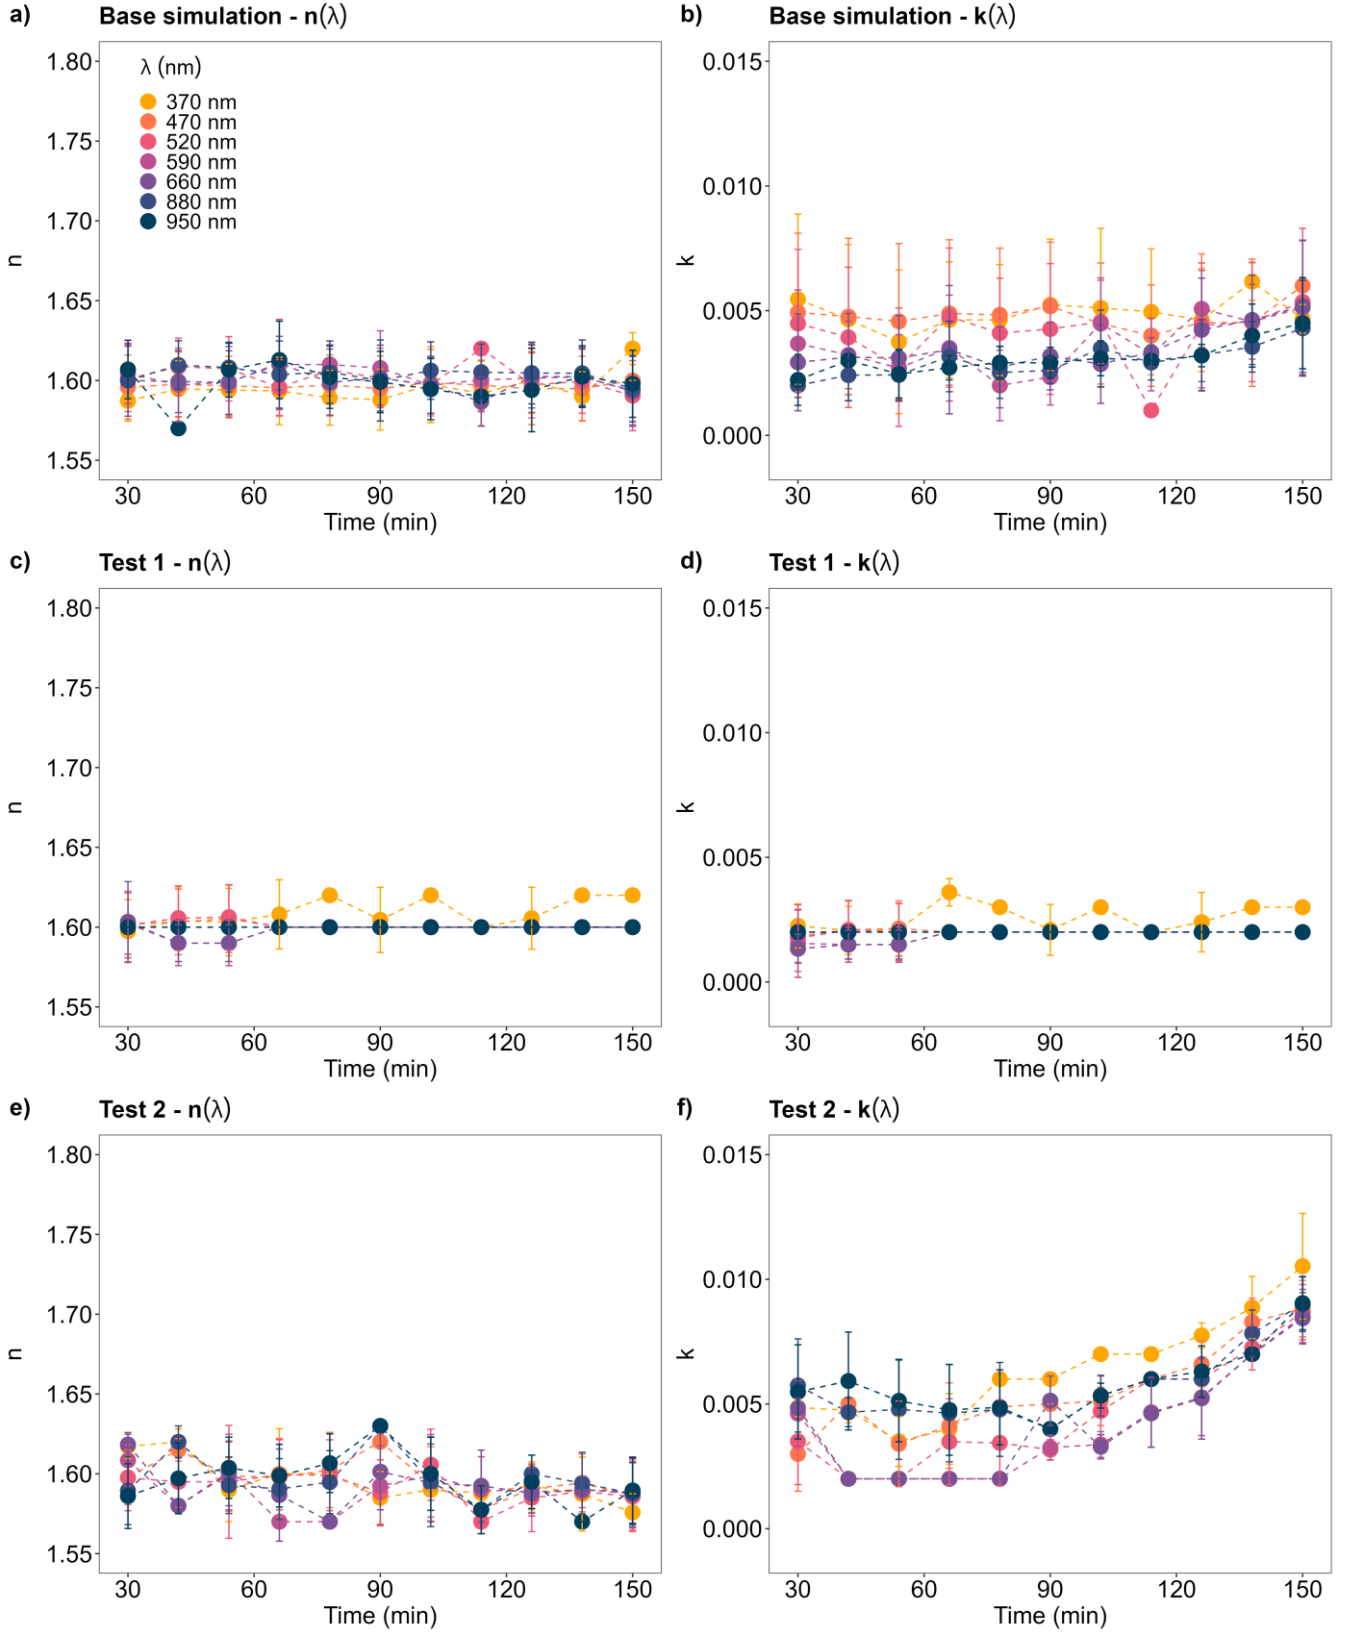

**Figure S19: Real index  $n(\lambda)$  and imaginary index  $k(\lambda)$  at  $\lambda = 370, 470, 520, 590, 660, 880, 950$  nm, from 30 min after the injection peak to 2.5 h. a-b) Base simulation; c-d) Test 1; e-f) Test 2. Data were retrieved at 12-min resolution. In Test 1, corrections and calculations were performed using the SMPS and GRIMM data plus 1 SD uncertainty. In Test 2, we used the SMPS and GRIMM data minus 1 SD uncertainty (see section 2.2.1 in the main text for details). Sample ID: Maeli2.**

## MIR45

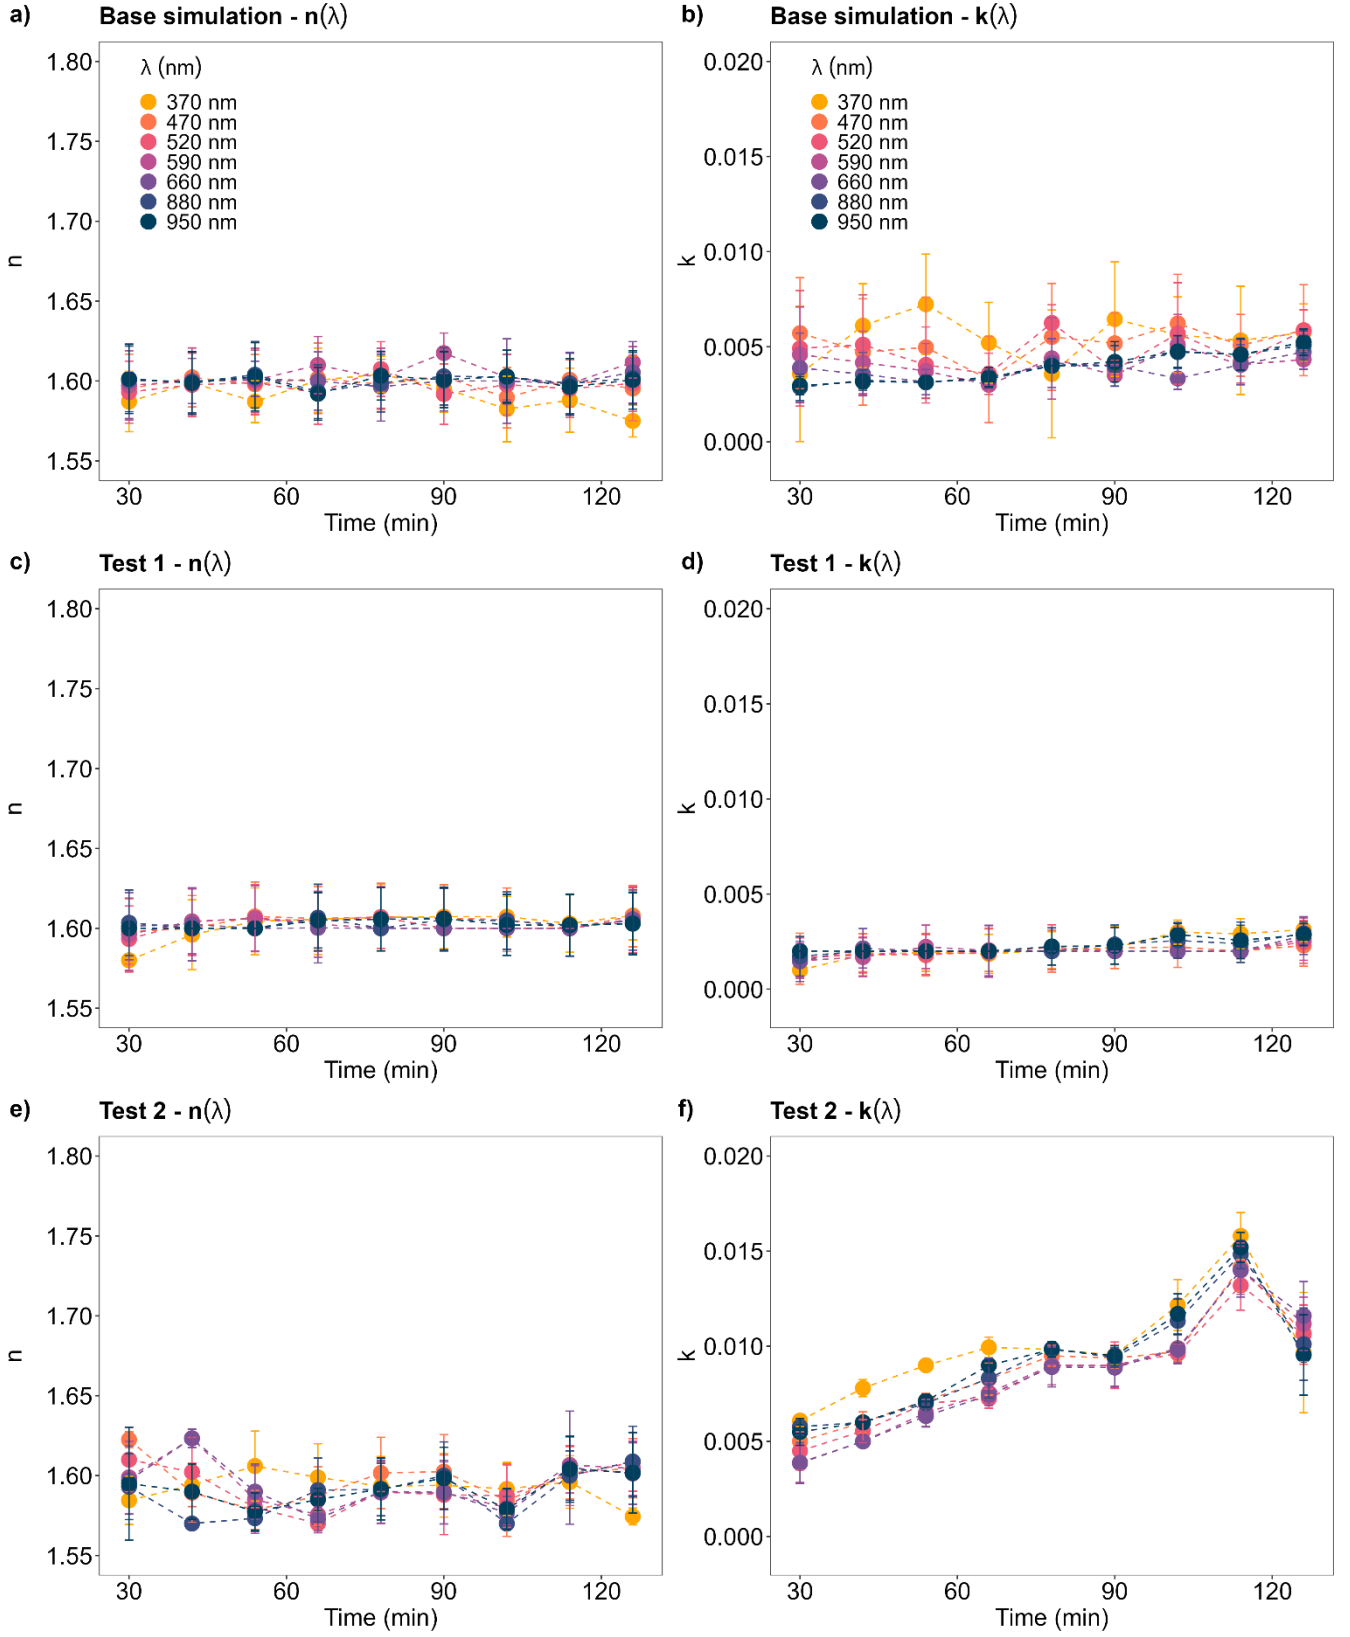

**Figure S20: Real index  $n(\lambda)$  and imaginary index  $k(\lambda)$  at  $\lambda = 370, 470, 520, 590, 660, 880, 950$  nm, from 30 min after the injection peak to 2.5 h. a-b) Base simulation; c-d) Test 1; e-f) Test 2. Data were retrieved at 12-min resolution. In Test 1, corrections and calculations were performed using the SMPS and GRIMM data plus 1 SD uncertainty. In Test 2, we used the SMPS and GRIMM data minus 1 SD uncertainty (see section 2.2.1 in the main text for details). Sample ID: MIR45.**

## References

- Bedidi, A., and Cervelle, B.: Light scattering by spherical particles with hematite and goethitelike optical properties: effect of water impregnation, *Journal of Geophysical Research: Solid Earth*, 98, 11941-11952, doi: 10.1029/93JB00188, 1993.
- Egan, W., and Hilgeman, T.: *Optical Properties of Inhomogeneous Materials: Applications to Geology, Astronomy, Chemistry and Engineering* Academic Press, New York, 1979.
- Fabian, D., Henning, Th., Joger, C., Mutschke, H., Dorschner, J., Werhan, O.: Olivine, EODG ARIA, available at [http://eodg.atm.ox.ac.uk/ARIA/data?Minerals/Olivine/non-oriented\\_\(Fabian\\_et\\_al.\\_2001\)/olivine\\_Fabian\\_2001.ri](http://eodg.atm.ox.ac.uk/ARIA/data?Minerals/Olivine/non-oriented_(Fabian_et_al._2001)/olivine_Fabian_2001.ri) (last access: 02 January 2020), 2001.
- Gao, L., Lemarchand, F., Lequime, M.: Quartz, Refractive index database, available at <https://refractiveindex.info/?shelf=main&book=SiO2&page=Gao> (last access: 05 January 2023), 2013.
- Huffman, D. R., and Stapp, J. L.: Optical measurements on solids of possible interstellar importance, in: *Interstellar dust and related topics*, Springer, 297-301, 1973.
- Khashan, M. A. and Nasif, A. Y.: Quartz glass, EODG ARIA, available at [http://eodg.atm.ox.ac.uk/ARIA/data?Minerals/Quartz/\(Khashan\\_and\\_Nassif\\_2001\)/quartz\\_Khashan\\_2001.ri](http://eodg.atm.ox.ac.uk/ARIA/data?Minerals/Quartz/(Khashan_and_Nassif_2001)/quartz_Khashan_2001.ri) (last access: 02 January 2020), 2001.
- Lemarchand, F.: Quartz, Refractive index database, available at <https://refractiveindex.info/?shelf=main&book=SiO2&page=Lemarchand> (last access: 05 January 2023), 2013.
- Longtin, D. R., Shettle, E. P., Hummel, J. R., and Pryce, J. D.: A wind dependent desert aerosol model: Radiative properties, AFGLTR-88-0112, Air Force Geophysics Laboratory, Hanscom AFB, MA, 1988.
- Philip, H. R.: Quartz glass, EODG ARIA, available at [http://eodg.atm.ox.ac.uk/ARIA/data?Minerals/Quartz/\(Philipp\\_1985\)/quartz\\_Philipp\\_1985.ri](http://eodg.atm.ox.ac.uk/ARIA/data?Minerals/Quartz/(Philipp_1985)/quartz_Philipp_1985.ri) (last access: 05 January 2023), 1985.
- Pollack, J. B., Toon, O. B., and Khare, B. N.: Optical properties of some terrestrial rocks and glasses, *Icarus*, 19, 372-389, 1973.
- Querry, M. R.: Magnetite, Refractive index database, available at <https://refractiveindex.info/?shelf=main&book=Fe3O4&> (last access: 02 January 2020), 1985.
- Rodríguez-de Marcos, L. V., Larruquert, J. I., Méndez, J. A., Aznárez, J. A.: Quartz, Refractive index database, available at [https://refractiveindex.info/?shelf=main&book=SiO2&page=Rodriguez-de\\_Marcos](https://refractiveindex.info/?shelf=main&book=SiO2&page=Rodriguez-de_Marcos) (last access: 05 January 2023), 2016.
- Triaud, A. H. M. J.: Hematite, EODG ARIA, available at [http://eodg.atm.ox.ac.uk/ARIA/data?Minerals/Hematite/\(Triaud\\_2005\)/hematite\\_Triaud\\_2005.ri](http://eodg.atm.ox.ac.uk/ARIA/data?Minerals/Hematite/(Triaud_2005)/hematite_Triaud_2005.ri) (last access: 05 January 2023), 2005.
